# Supplementary material for: Multi-ancestry Genome Wide Association Study Meta-analysis of Non-syndromic Orofacial Clefts
Source: bioRxiv or medRxiv preprint supplement (doi:10.1101/2024.12.06.24318522), 2024-12-13
Supplement: Supplementary file [file media-1.pdf]

## Multi-ancestry Genome Wide Association Study Meta-analysis of Non-syndromic Orofacial Clefts

Zhonglin Jia<sup>1,2,\*</sup>, Nandita Mukhopadhyay<sup>3</sup>, Zhenglin Yang<sup>4</sup>, Azeez Butali<sup>5</sup>, Jialin Sun<sup>1</sup>, Yue You<sup>1</sup>, Meilin Yao<sup>1</sup>, Qi Zhen<sup>6</sup>, Jian Ma<sup>7</sup>, Miao He<sup>8</sup>, Yongchu Pan<sup>9</sup>, Azeez Alade<sup>10</sup>, Yirui Wang<sup>11</sup>, Mojisola Olujitan<sup>12</sup>, Mengchun Qi<sup>13</sup>, Wasiu Lanre Adeyemo<sup>14</sup>, Carmen J. Buxó<sup>15</sup>, Lord J.J Gowans<sup>16</sup>, Mekonen Eshete<sup>17</sup>, Yongqing Huang<sup>7</sup>, Chenghao Li<sup>1</sup>, Lin Wang<sup>9</sup>, Zhuan Bian<sup>8</sup>, Bing Shi<sup>1</sup>, Seth M. Weinberg<sup>3,18</sup>, Jeffrey C. Murray<sup>19,#</sup>, Liangdan Sun<sup>20,21,\*</sup>, Mary L. Marazita<sup>3,18,#</sup>, Rachel M. Freathy<sup>2,#</sup>, Robin N. Beaumont<sup>2,\*</sup>

\*Corresponding authors

# Senior authors

- 1 State Key Laboratory of Oral Diseases & National Clinical Research Center for Oral Diseases & Dept. of cleft lip and palate, West China Hospital of Stomatology, Sichuan University, Chengdu, 610000, China.
- 2 Department of Clinical and Biomedical Sciences, Faculty of Health and Life Sciences, University of Exeter, Exeter, EX2 5DW, UK.
- 3 Center for Craniofacial and Dental Genetics, Department of Oral and Craniofacial Sciences, School of Dental Medicine, University of Pittsburgh, Pittsburgh, PA, USA.
- 4 The Sichuan Provincial Key Laboratory for Human Disease Gene Study, Department of Clinical Laboratory, Sichuan Provincial People's Hospital, School of Medicine, University of Electronic Science and Technology of China, Chengdu, China.
- 5 Department of Oral Biology, Radiology, and Medicine, University of Iowa, Iowa City, IA 52242, USA.
- 6 North China University of Science and Technology Affiliated Hospital, Tangshan, 063000, China.
- 7 Department of Oral and Maxillofacial Surgery, Hospital of Stomatology, The General Hospital of Ningxia Medical University, Yinchuan, China.
- 8 State Key Laboratory of Oral & Maxillofacial Reconstruction and Regeneration, Key Laboratory of Oral Biomedicine Ministry of Education, Hubei Key Laboratory of Stomatology, School & Hospital of Stomatology, Wuhan University, Wuhan, Hubei, China.
- 9 State Key Laboratory Cultivation Base of research, Prevention and Treatment for Oral Diseases, Jiangsu Province Engineering Research Center of Stomatological Translational Medicine, Department of Orthodontics, The Affiliated Stomatological Hospital of Nanjing Medical University, Nanjing, China.
- 10 NIH Center for Clinical Research, USA.
- 11 Affiliated Hospital of North China University of Science and Technology, Tangshan, Hebei, 063210, China.
- 12 Iowa Institute for Oral Health Research, College of Dentistry, University of Iowa
- 13 College of Stomatology, North China University of Science and Technology, Tangshan, Hebei, 063210, China.
- 14 Department of Oral and Maxillofacial Surgery, College of Medicine University of Lagos, Lagos, Nigeria.
- 15 School of Dental Medicine, University of Puerto Rico, San Juan, PR 00925, USA.
- 16 Kwame Nkrumah University of Science and Technology, Kumasi, Ghana
- 17 Addis Ababa University, Addis Ababa, Ethiopia
- 18 Department of Human Genetics, School of Public Health, University of Pittsburgh, Pittsburgh, PA, USA.
- 19 Department of Pediatrics, University of Iowa, Iowa City, IA 52242, USA
- 20 North China University of Science and Technology Affiliated Hospital Tangshan, 063000 China.
- 21 Department of Dermatology, the First Affiliated Hospital of Anhui Medical University, Hefei, 230032, China.

## ABSTRACT

Non-syndromic orofacial clefts (NSOC) are common craniofacial birth defects, and result from both genetic and environmental factors. NSOC include three major sub-phenotypes: non-syndromic cleft lip with palate (NSCLP), non-syndromic cleft lip only (NSCLO) and non-syndromic cleft palate only (NSCPO). NSCLP and NSCLO are also sometimes grouped as non-syndromic cleft lip with or without cleft palate (NSCL/P) based on epidemiology. Currently known loci only explain a limited proportion of the heritability of NSOC. Further, differences in genetic susceptibility among the sub-phenotypes are poorly characterized. We performed a multi-ancestry GWAS meta-analysis on 44,094 individuals (9,381 cases, 28,510 controls, 2042 case-parent trios and 18 multiplex pedigrees) of East Asian, European, Latin and South American, and African ancestry for both NSOC and subtypes. We identified 50 loci, including 11 novel loci: four loci (CALD1, SHH, NRG1 and LINC00320) associated with both NSOC and NSCL/P, two loci (NTRK1 and RUNX1) only associated with NSOC, four loci (HMGCR, PRICKLE1, SOX9 and MYH9) only associated with NSCL/P and one locus (ALX1) specifically associated with NSCLO. Five of the novel loci are located in regions containing genes associated with syndromic orofacial clefts (SHH, NTRK1, CALD1, ALX1 and SOX9); seven of the novel loci are located in regions containing genes implicated in craniofacial development (HMGCR, SHH, PRICKLE1, ALX1, SOX9, RUNX1, MYH9). Genetic correlation and colocalization analyses revealed an overlap between signals associated with NSCLO, NSCPO and NSCLP, but there were also notable differences, emphasizing the complexity of common and distinct genetic processes affecting lip and palate development.

Supplementary Table 1. 81 Loci reported by previous GWASs

| No.Loci | Chromosome | Position (b37) | SNP        | Gene               | Associated Phen | Published GWAS                      | PMID              | Data Multi-Ancestry GWAS Meta |
|---------|------------|----------------|------------|--------------------|-----------------|-------------------------------------|-------------------|-------------------------------|
| 1       | 1          | 3047252        | rs2817178  | <i>PRDM16</i>      | NSCLP           | Li et al.2022                       | 35217232          | No significance               |
| 2       | 1          | 18972776       | rs9439713  | <i>PAX7</i>        | NSCLP,NSOC      | Leslie et al.2017                   | 28054174          | Confirmed                     |
| 2       | 1          | 18976489       | rs9439714  | <i>PAX7</i>        | NSCLP           | Mukhopadhyay et al.2017             | 33898419          | Confirmed                     |
| 2       | 1          | 18978372       | rs4920524  | <i>PAX7</i>        | NSCLP           | Leslie et al.2016                   | 27033726          | Confirmed                     |
| 2       | 1          | 18979874       | rs742071   | <i>PAX7</i>        | NSCLP           | Ludwig et al.2012                   | 22863734          | Confirmed                     |
| 3       | 1          | 24669457       | rs41268753 | <i>GRHL3</i>       | NSCPO           | Leslie et al.2017;Leslie et al.2016 | 28054174;27033726 | Confirmed                     |
| 4       | 1          | 59832057       | rs11588505 | <i>FGGY</i>        | NSOC            | Yu et al.2023                       | 37326468          | Confirmed                     |
| 5       | 1          | 62673037       | rs7542665  | <i>LITD1</i>       | NSCLP           | Li et al.2022                       | 35217232          | No significance               |
| 5       | 1          | 64627002       | rs11208372 | <i>ROR1, UBE2U</i> | NSCLP           | Li et al.2022                       | 35217232          | No significance               |
| 6       | 1          | 94553438       | rs560426   | <i>ARHGAP29</i>    | NSCLP           | Beaty et al.2010;Ludwig et al.2012  | 20436469;22863734 | Confirmed                     |
| 6       | 1          | 94558110       | rs66515264 | <i>ARHGAP29</i>    | NSCLP,NSOC      | Leslie et al.2017                   | 28054174;22863734 | Confirmed                     |
| 6       | 1          | 94558256       | rs4147882  | <i>ARHGAP29</i>    | NSCLP           | Leslie et al.2016                   | 27033726          | Confirmed                     |
| 6       | 1          | 94570016       | rs481931   | <i>ARHGAP29</i>    | NSCLP           | Beaty et al.2010;Li et al.2022      | 20436469;35217232 | Confirmed                     |
| 6       | 1          | 94575056       | rs4147811  | <i>ARHGAP29</i>    | NSCLP           | Beaty et al.2010                    | 20436469          | Confirmed                     |
| 7       | 1          | 209947548      | rs11119345 | <i>IRF6</i>        | NSCLP           | Leslie et al.2016                   | 27033726          | Confirmed                     |
| 7       | 1          | 209962794      | rs2073485  | <i>IRF6</i>        | NSCLP           | Beaty et al.2010                    | 20436469          | Confirmed                     |
| 7       | 1          | 209964080      | rs2235371  | <i>IRF6</i>        | NSCLP,NSCLO     | Sun et al.2015;Huang et al.2019     | 25775280;31609978 | Confirmed                     |
| 7       | 1          | 209966629      | rs17015217 | <i>IRF6</i>        | NSCLP           | Mukhopadhyay et al.2017             | 33898419          | Confirmed                     |
| 7       | 1          | 209968684      | rs2013162  | <i>IRF6</i>        | NSCLP           | Beaty et al.2010                    | 20436469          | Confirmed                     |
| 7       | 1          | 209975392      | rs2235377  | <i>IRF6</i>        | NSCLO           | Huang et al.2019                    | 31609978          | Confirmed                     |
| 7       | 1          | 209977111      | rs861020   | <i>IRF6</i>        | NSCLP,NSCLP     | Beaty et al.2010;Ludwig et al.2012  | 20436469;22863734 | Confirmed                     |
| 7       | 1          | 209977844      | rs12405750 | <i>IRF6</i>        | NSCLO           | Huang et al.2019                    | 31609978          | Confirmed                     |
| 7       | 1          | 209984470      | rs75477785 | <i>IRF6</i>        | NSCLP           | Leslie et al.2017*                  | 28054174          | Confirmed                     |
| 7       | 1          | 209988047      | rs10863790 | <i>IRF6</i>        | NSCLP,NSCLO     | Beaty et al.2010;Sun et al.2015     | 20436469;25775280 | Confirmed                     |
| 7       | 1          | 209988527      | rs77249837 | <i>IRF6</i>        | NSCLP           | Li et al.2022                       | 35217232          | Confirmed                     |
| 7       | 1          | 209989092      | rs72741048 | <i>IRF6</i>        | NSCLO           | Huang et al.2019                    | 31609978          | Confirmed                     |
| 7       | 1          | 209989270      | rs642961   | <i>IRF6</i>        | NSCLP           | Yu et al.2017                       | 28232668          | Confirmed                     |
| 7       | 1          | 209992501      | rs1109430  | <i>IRF6</i>        | NSOC            | Leslie et al.2017*                  | 28054174          | Confirmed                     |
| 7       | 1          | 210048819      | rs2064163  | <i>IRF6</i>        | NSCLP           | Yu et al.2017                       | 28232668          | Confirmed                     |
| 7       | 1          | 210211912      | rs189000   | <i>IRF6</i>        | NSCLO           | Huang et al.2019                    | 31609978          | Confirmed                     |
| 7       | 1          | 210226819      | rs1387934  | <i>IRF6</i>        | NSCLO           | Huang et al.2019                    | 31609978          | Confirmed                     |
| 8       | 2          | 9983008        | rs72782605 | <i>TAF1B</i>       | NSCLP           | Li et al.2022                       | 35217232          | Confirmed                     |
| 9       | 2          | 16710565       | rs4832468  | <i>FAM49A</i>      | NSCLO           | Huang et al.2019                    | 31609978          | Confirmed                     |
| 9       | 2          | 16713395       | rs6745357  | <i>FAM49A</i>      | NSCLP           | Mukhopadhyay et al.2017             | 22863734          | Confirmed                     |

|    |   |           |             |                       |             |                                                        |                            |                 |
|----|---|-----------|-------------|-----------------------|-------------|--------------------------------------------------------|----------------------------|-----------------|
| 9  | 2 | 16729357  | rs7566780   | <i>FAM49A</i>         | NSCLP,NSOC  | Leslie et al.2017*                                     | 28054174                   | Confirmed       |
| 9  | 2 | 16733054  | rs10172734  | <i>FAM49A</i>         | NSCLP       | Yu et al.2017                                          | 28232668                   | Confirmed       |
| 9  | 2 | 16733928  | rs7552      | <i>FAM49A</i>         | NSCLP,NSCLO | Leslie et al.2016;Huan                                 | 27033726;316099            | Confirmed       |
| 10 | 2 | 43540125  | rs7590268   |                       | NSCLP       | Ludwig et al.2012                                      | 22863734                   | No significance |
| 11 | 2 | 45127854  | rs11887207  | <i>SIX3</i>           | NSCLP       | Li et al.2022                                          | 35217232                   | No significance |
| 12 | 2 | 82025185  | rs80004662  | <i>CTNNA2</i>         | NSCPO       | Butali et al.2019                                      | 30452639                   | NA              |
| 12 | 2 | 82028390  | rs113691307 | <i>CTNNA2</i>         | NSCPO       | Butali et al.2019                                      | 30452639                   | NA              |
| 13 | 2 | 130176577 | rs17491637  | -                     | NSCLP       | Yu et al.2017                                          | 28232668                   | No significance |
| 14 | 3 | 50344178  | rs78138837  | <i>HYAL1</i>          | NSOC        | Yu et al.2023                                          | 37326468                   | Confirmed       |
| 15 | 3 | 54903701  | rs2703028   | <i>CACNA2D3</i>       | NSCLP       | Li et al.2022                                          | 35217232                   | No significance |
| 16 | 3 | 56063735  | rs10601122  | <i>ERC2</i>           | NSOC        | Yu et al.2023                                          | 37326468                   | No significance |
| 17 | 3 | 64625244  | rs61021131  | <i>ADAMTS9</i>        | NSOC        | Yu et al.2023                                          | 37326468                   | Confirmed       |
| 18 | 3 | 89534377  | rs7632427   | -                     | NSCLP       | Ludwig et al.2012                                      | 22863734                   | No significance |
| 19 | 3 | 99711816  | rs9873878   | <i>FILIP1L</i>        | NSCLP       | Li et al.2022                                          | 35217232                   | Confirmed       |
| 20 | 3 | 150092627 | rs1450341   | <i>TSC22D2</i>        | NSCLP       | Li et al.2022                                          | 35217232                   | No significance |
| 21 | 3 | 189553372 | rs76479869  | <i>TP63</i>           | NSCLP       | Leslie et al.2017*                                     | 28054174                   | Confirmed       |
| 22 | 3 | 196777238 | rs71161992  | <i>DLG1</i>           | NSCLP       | Li et al.2022                                          | 35217232                   | No significance |
| 23 | 4 | 4852849   | rs735510    | <i>MSX1</i>           | NSCLP       | Li et al.2022                                          | 35217232                   | No significance |
| 24 | 4 | 124807935 | rs17007553  | <i>LOC285419</i>      | NSCLP       | Li et al.2022                                          | 35217232                   | No significance |
| 25 | 5 | 44068846  | rs10462065  | <i>FGF10</i>          | NSCLP       | Li et al.2022                                          | 35217232                   | Confirmed       |
| 26 | 5 | 73317553  | rs6453037   |                       | NSCPO       | He et al.2020                                          | 32758111                   | No significance |
| 27 | 5 | 132847845 | rs17166739  |                       | NSCPO       | He et al.2020                                          | 32758111                   | No significance |
| 28 | 6 | 1945408   | rs3800146   | <i>GMDS</i>           | NSCLP       | Li et al.2022                                          | 35217232                   | Confirmed       |
| 29 | 6 | 9442330   | rs7771515   | <i>OFCC1</i>          | NSCLP       | Yu et al.2017                                          | 28232668                   | No significance |
| 29 | 6 | 9469238   | rs9381107   | <i>OFCC1</i>          | NSCLP       | Yu et al.2017                                          | 28232668                   | No significance |
| 30 | 6 | 162671456 | rs12175475  | <i>PARK2</i>          | NSCPO       | Leslie et al.2016                                      | 27033726                   | NA              |
| 31 | 8 | 8865923   | rs2979260   | <i>ER11</i>           | NSCLP       | Li et al.2022                                          | 35217232                   | No significance |
| 32 | 8 | 77496113  | rs11993273  | <i>ZFHX4</i>          | NSCLP       | Li et al.2022                                          | 35217232                   | Confirmed       |
| 33 | 8 | 88868340  | rs12543318  | <i>DCAF4L2</i>        | NSCLP/NSOC  | Ludwig et al.2012;Lesl                                 | 22863734;280541            | Confirmed       |
| 34 | 8 | 90231591  | rs318271    | <i>RIPK2</i>          | NSCLP       | Li et al.2022                                          | 35217232                   | Confirmed       |
| 35 | 8 | 95541302  | rs957448    | <i>VIRMA</i>          | NSCLP       | Yu et al.2017                                          | 28232668                   | Confirmed       |
| 35 | 8 | 95594720  | rs12682601  | <i>VIRMA</i>          | NSCLP       | Li et al.2022                                          | 35217232                   | Confirmed       |
| 36 | 8 | 100369465 | rs3110405   | <i>STK3, OSR2, VF</i> | NSCLP       | Li et al.2022                                          | 35217232                   | No significance |
| 37 | 8 | 129933720 | rs72728734  | <i>LINC00824</i>      | NSCLP       | Leslie et al.2016                                      | 27033726                   | Confirmed       |
| 37 | 8 | 129946154 | rs987525    | <i>LINC00824</i>      | NSCLP       | Birnbaum et al.2009;Beaty et al.2010;Ludwig et al.2012 | 19270707;20436469;22863734 | Confirmed       |

|    |    |           |             |                    |                   |                           |                 |                 |
|----|----|-----------|-------------|--------------------|-------------------|---------------------------|-----------------|-----------------|
| 37 | 8  | 129951769 | rs7815993   | <i>LINC00824</i>   | NSCL/P            | Li et al.2022             | 35217232        | Confirmed       |
| 37 | 8  | 129964873 | rs17242358  | <i>LINC00824</i>   | NSOC              | Leslie et al.2017*        | 28054174        | Confirmed       |
| 37 | 8  | 129976136 | rs55658222  | <i>LINC00824</i>   | NSCL/P            | Leslie et al.2016;Leslie  | 27033726;280541 | Confirmed       |
| 37 | 8  | 129990382 | rs72728755  | <i>LINC00824</i>   | NSCL/P            | Mukhopadhyay et al.20     | 33898419        | Confirmed       |
| 38 | 9  | 89289528  | rs1331446   | <i>ZCCHC6</i>      | NSCL/P            | Li et al.2022             | 35217232        | No significance |
| 39 | 9  | 92212750  | rs1475537   | <i>GADD45G</i>     | NSCL/P            | Li et al.2022             | 35217232        | Confirmed       |
| 40 | 9  | 98280788  | rs28469297  | <i>PTCH1</i>       | NSCL/P            | Li et al.2022             | 35217232        | Confirmed       |
| 41 | 9  | 100619719 | rs12347191  | <i>FOXE1</i>       | NSOC              | Leslie et al.2017*        | 28054174        | Confirmed       |
| 42 | 9  | 127327763 | rs10114038  | <i>NR6A1</i>       | NSCL/P            | Li et al.2022             | 35217232        | Confirmed       |
| 43 | 9  | 129944999 | rs7035976   | <i>ANGPTL2</i>     | Cleft Hard Palate | Robinson et al.2023       | 37719664        | No significance |
| 44 | 10 | 29233160  | rs1832845   | <i>LOC10050760</i> | NSCL/P            | Li et al.2022             | 35217232        | No significance |
| 45 | 10 | 99695194  | rs474558    |                    | NSCLP             | Yu et al.2017             | 28232668        | No significance |
| 46 | 10 | 102657733 | rs3050320   | <i>FAM178A</i>     | NSCL/P            | Li et al.2022             | 35217232        | No significance |
| 47 | 10 | 118715399 | rs7902527   | <i>VAX1</i>        | NSCLO             | Huang et al.2019          | 31609978        | Confirmed       |
| 47 | 10 | 118827560 | rs7078160   | <i>VAX1</i>        | NSCL/P            | Ludwig et al.2012         | 22863734        | Confirmed       |
| 47 | 10 | 118834991 | rs4752028   | <i>VAX1</i>        | NSCLO             | Huang et al.2019          | 31609978        | Confirmed       |
| 47 | 10 | 118846294 | rs10886040  | <i>VAX1</i>        | NSCL/P,NSOC       | Leslie et al.2017;Li et a | 28054174;352172 | Confirmed       |
| 47 | 10 | 118893231 | rs6585429   | <i>VAX1</i>        | NSCLP             | Yu et al.2017             | 28232668        | Confirmed       |
| 48 | 11 | 44843134  | rs11038167  |                    | NSCPO             | He et al.2020             | 32758111        | No significance |
| 49 | 11 | 102079713 | rs117496742 | <i>YAP1</i>        | NSCPO             | Leslie et al.2016         | 27033726        | NA              |
| 50 | 12 | 53357335  | rs2363632   | <i>KRT18</i>       | NSCL/P            | Li et al.2022             | 35217232        | No significance |
| 51 | 12 | 56384687  | rs705698    | <i>RAB5B</i>       | NSCL/P            | Li et al.2022             | 35217232        | No significance |
| 52 | 12 | 71962975  | rs10784927  | <i>LGR5</i>        | NSCL/P            | Li et al.2022             | 35217232        | Confirmed       |
| 53 | 12 | 111414461 | rs12229654  |                    | NSCLP             | Yu et al.2017             | 28232668        | NA              |
| 54 | 12 | 112518803 | rs11066150  |                    | NSCLP             | Yu et al.2017             | 28232668        | NA              |
| 54 | 12 | 112923393 | rs12229892  |                    | NSCLP             | Yu et al.2017             | 28232668        | NA              |
| 55 | 13 | 74316318  | rs12865628  | <i>KLF12</i>       | NSOC              | Yu et al.2023             | 37326468        | No significance |
| 56 | 13 | 80679302  | rs11841646  | <i>SPRY2</i>       | NSCL/P,NSOC       | Leslie et al.2017*        | 28054174        | Confirmed       |
| 56 | 13 | 80692811  | rs8001641   | <i>SPRY2</i>       | NSCL/P            | Ludwig et al.2012         | 22863734        | Confirmed       |
| 56 | 13 | 80701485  | rs1854110   | <i>SPRY2</i>       | NSCL/P            | Li et al.2022             | 35217232        | Confirmed       |
| 57 | 13 | 99395594  | rs4646211   | <i>DOCK9</i>       | NSCPO             | Huang et al.2019          | 31609978        | No significance |
| 58 | 13 | 100510372 | rs7982561   | <i>CLYBL</i>       | NSCL/P            | Li et al.2022             | 35217232        | Confirmed       |
| 59 | 14 | 37239147  | rs730643    | <i>PAX9</i>        | NSCPO             | Huang et al.2019          | 31609978        | Confirmed       |
| 59 | 14 | 37239854  | rs2415363   | <i>PAX9</i>        | NSCPO             | Huang et al.2019          | 31609978        | Confirmed       |
| 60 | 14 | 51855553  | rs4901116   | <i>LINC00640</i>   | NSCL/P            | Li et al.2022             | 35217232        | Confirmed       |
| 61 | 14 | 95375543  | rs1243567   | <i>GSC</i>         | NSCL/P            | Li et al.2022             | 35217232        | Confirmed       |
| 62 | 15 | 33043657  | rs1919362   | <i>GREM1</i>       | NSCL/P            | Li et al.2022             | 35217232        | No significance |
| 63 | 15 | 63312632  | rs1873147   |                    | NSCL/P            | Ludwig et al.2012         | 22863734        | No significance |

|    |    |          |            |                 |             |                                           |                   |                 |
|----|----|----------|------------|-----------------|-------------|-------------------------------------------|-------------------|-----------------|
| 64 | 15 | 74744399 | rs2289187  | <i>UBL7-DT</i>  | NSCLP       | Yu et al.2017                             | 28232668          | Confirmed       |
| 64 | 15 | 74853488 | rs8029215  | <i>UBL7-DT</i>  | NSCL/P      | Li et al.2022                             | 35217232          | Confirmed       |
| 64 | 15 | 74889163 | rs11072494 | <i>UBL7-DT</i>  | NSCL/P      | Leslie et al.2017*                        | 28054174          | Confirmed       |
| 64 | 15 | 74899500 | rs6495117  | <i>UBL7-DT</i>  | NSCLP       | Yu et al.2017                             | 28232668          | Confirmed       |
| 65 | 16 | 3969297  | rs2283483  | <i>CREBBP</i>   | NSCLP       | Li et al.2022                             | 35217232          | Confirmed       |
| 66 | 17 | 8930222  | rs11273201 | <i>NTN1</i>     | NSCLP       | Leslie et al.2016                         | 27033726          | Confirmed       |
| 66 | 17 | 8930225  | rs7406226  | <i>NTN1</i>     | NSCLP       | Leslie et al.2016                         | 27033726          | Confirmed       |
| 66 | 17 | 8932082  | rs4791331  | <i>NTN1</i>     | NSCLP       | Li et al.2022                             | 35217232          | Confirmed       |
| 66 | 17 | 8932119  | rs4791774  | <i>NTN1</i>     | NSCLP       | Sun et al.2015                            | 25775280          | Confirmed       |
| 66 | 17 | 8947708  | rs12944377 | <i>NTN1</i>     | NSCLP,NSOC  | Leslie et al.2017*                        | 28054174          | Confirmed       |
| 66 | 17 | 8948104  | rs16957821 | <i>NTN1</i>     | NSCLP       | Mukhopadhyay et al.2017                   | 33898419          | Confirmed       |
| 67 | 17 | 44977040 | rs12600562 | <i>WNT9B</i>    | NSCLP       | Li et al.2022                             | 35217232          | Confirmed       |
| 68 | 17 | 54752926 | rs8182331  | <i>NOG</i>      | NSCLP       | Li et al.2022                             | 35217232          | Confirmed       |
| 68 | 17 | 54773238 | rs227731   | <i>NOG</i>      | NSCLP       | Ludwig et al.2012;Leslie et al.2016       | 22863734;28054174 | Confirmed       |
| 69 | 17 | 61076428 | rs1588366  | <i>TANC2</i>    | NSCLP       | Leslie et al.2016;Mukhopadhyay et al.2017 | 27033726;33898419 | No significance |
| 70 | 17 | 73717421 | rs16967277 | <i>RECQL5</i>   | NSCLP       | Li et al.2022                             | 35217232          | No significance |
| 71 | 17 | 77267377 | rs1975866  | <i>RBFOX3</i>   | NSCLP       | Mukhopadhyay et al.2017                   | 33898419          | No significance |
| 72 | 18 | 34116874 | rs4799867  | <i>FHOD3</i>    | NSCLP       | Li et al.2022                             | 35217232          | No significance |
| 73 | 18 | 37254234 | rs36019844 | <i>MIR924HG</i> | NSCLP       | Avasthi et al.2021                        | 34941638          | NA              |
| 74 | 19 | 33521150 | rs73039428 | <i>RHPN2</i>    | NSCLP       | Leslie et al.2016                         | 27033726          | Confirmed       |
| 74 | 19 | 33546283 | rs2003950  | <i>RHPN2</i>    | NSCLP       | Li et al.2022                             | 35217232          | Confirmed       |
| 75 | 19 | 45882693 | rs8101662  | <i>KLC3</i>     | NSCLP       | Li et al.2022                             | 35217232          | No significance |
| 76 | 20 | 39261054 | rs6072081  | <i>MAFB</i>     | NSCLP,NSOC  | Beaty et al.2010;Leslie et al.2016        | 20436469;28054174 | Confirmed       |
| 76 | 20 | 39261979 | rs6065259  | <i>MAFB</i>     | NSCLP       | Beaty et al.2010                          | 20436469          | Confirmed       |
| 76 | 20 | 39268516 | rs17820943 | <i>MAFB</i>     | NSCLP,NSCLO | Beaty et al.2010;Huang et al.2017         | 20436469;316099   | Confirmed       |
| 76 | 20 | 39269074 | rs13041247 | <i>MAFB</i>     | NSCLP       | Beaty et al.2010;Ludwig et al.2012        | 20436469;22863734 | Confirmed       |
| 76 | 20 | 39270816 | rs11696257 | <i>MAFB</i>     | NSCLP       | Beaty et al.2010                          | 20436469          | Confirmed       |
| 76 | 20 | 39272959 | rs4812450  | <i>MAFB</i>     | NSCLP       | Li et al.2022                             | 35217232          | Confirmed       |
| 76 | 20 | 39281629 | rs6102085  | <i>MAFB</i>     | NSCLP       | Beaty et al.2010                          | 20436469          | Confirmed       |
| 77 | 20 | 50404452 | rs1018422  | <i>ATP9A</i>    | NSCLP       | Li et al.2022                             | 35217232          | No significance |
| 78 | 21 | 40014437 | rs463269   | <i>ERG</i>      | NSCLP       | Li et al.2022                             | 35217232          | Confirmed       |
| 79 | 22 | 19799410 | rs2073764  | <i>ARVCF</i>    | NSCLP       | Yu et al.2017                             | 28232668          | Confirmed       |
| 79 | 22 | 19976845 | rs756653   | <i>ARVCF</i>    | NSCLP       | Li et al.2022                             | 35217232          | Confirmed       |
| 80 | 22 | 31558820 | rs5753486  | <i>PLA2G3</i>   | NSCLP       | Li et al.2022                             | 35217232          | No significance |
| 81 | 22 | 45149303 | rs7284589  | <i>ARHGAP8</i>  | NSCLP       | Li et al.2022                             | 35217232          | Confirmed       |

Note: NSOC, non-syndromic orofacial cleft cases by combining NSCLP, NSCLO and NSCPO together; NSCL/P, non-syndromic cleft lip with or without palate (NSCLP&NSCLO); NSCLP, non-syndromic cleft lip and palate; NSCLO, non-syndromic cleft lip only; NSCPO, non-syndromic cleft palate only; only listing the loci (lead SNPs) achieving genome-wide significant level (5.0E-08) in the discovery phase.

Supplementary Table 2. Sample information of multi-ancestry GWAS Meta-analysis

| Phenotype | Study                        | Population                   | Case | Control                                   | Total                                  |
|-----------|------------------------------|------------------------------|------|-------------------------------------------|----------------------------------------|
| NSOC      | POFC1                        | Asian                        | 583  | 1589                                      | 2172                                   |
|           |                              | European                     | 845  | 3343                                      | 4188                                   |
|           |                              | Latin South American         | 1298 | 3464                                      | 4762                                   |
|           | CHW_Axiom                    | Han Chinese                  | 427  | 419                                       | 846                                    |
|           | Huang et al                  | Han Chinese                  | 945  | 5068                                      | 6013                                   |
|           | CHE_Axiom&HSA                | Han Chinese                  | 322  | 722                                       | 1044                                   |
|           | CHS_ZH                       | Han Chinese                  | 3012 | 11746                                     | 14758                                  |
|           | Butail et al                 | African                      | 1019 | 2159                                      | 3178                                   |
| GENEVA*   | Mix Ancestry(Aisan&European) |                              |      | 6203 (2042trios & 18 multiplex pedigrees) |                                        |
| NSCL/P    | POFC1                        | Asian                        | 445  | 1246                                      | 1691                                   |
|           |                              | European                     | 569  | 2704                                      | 3273                                   |
|           |                              | Latin South American         | 1050 | 2988                                      | 4038                                   |
|           | CHW_Axiom                    | Han Chinese                  | 420  | 419                                       | 839                                    |
|           | Huang et al                  | Han Chinese                  | 945  | 5068                                      | 6013                                   |
|           | CHE_Axiom&HSA                | Han Chinese                  | 322  | 722                                       | 1044                                   |
|           | CHS_ZH                       | Han Chinese                  | 2025 | 11746                                     | 13771                                  |
|           | Butail et al                 | African                      | 814  | 2159                                      | 2973                                   |
| GENEVA*   | Mix Ancestry(Aisan&European) |                              |      | 4786 (1579trios & 12 multiplex pedigrees) |                                        |
| NSCLP     | POFC1                        | Asian                        | 274  | 1055                                      | 1329                                   |
|           |                              | European                     | 416  | 2454                                      | 2870                                   |
|           |                              | Latin South American         | 884  | 2766                                      | 3650                                   |
|           | CHW_Axiom                    | Han Chinese                  | 275  | 419                                       | 694                                    |
|           | CHE_Axiom&HSA                | Han Chinese                  | 215  | 722                                       | 937                                    |
|           | CHS_ZH                       | Han Chinese                  | 2025 | 11746                                     | 13771                                  |
|           | GENEVA*                      | Mix Ancestry(Aisan&European) |      |                                           | 3411 (1126trios&8 multiplex pedigrees) |
| NSCLO     | POFC1                        | Asian                        | 171  | 785                                       | 956                                    |
|           |                              | European                     | 153  | 1917                                      | 2070                                   |
|           |                              | Latin South American         | 166  | 1622                                      | 1788                                   |
|           | CHW_Axiom                    | Han Chinese                  | 145  | 419                                       | 564                                    |
|           | Huang et al.                 | Han Chinese                  | 945  | 5068                                      | 6013                                   |
|           | CHE_Axiom&HSA                | Han Chinese                  | 107  | 722                                       | 829                                    |
| GENEVA*   | Mix Ancestry(Aisan&European) |                              |      | 1375 (453trios & 4 multiplex pedigrees)   |                                        |
| NSCPO     | POFC1                        | European                     | 38   | 835                                       | 873                                    |
|           |                              | Latin South American         | 21   | 626                                       | 647                                    |
|           | Huang et al                  | Han Chinese                  | 930  | 5068                                      | 5998                                   |
|           | CHS_ZH                       | Han Chinese                  | 987  | 11746                                     | 12733                                  |
|           | Butail et al                 | African                      | 205  | 2159                                      | 2364                                   |
| GENEVA*   | Mix Ancestry(Aisan&European) |                              |      | 1407 (460trios&6 multiplex pedigrees)     |                                        |

**Note:** NSOC, non-syndromic orofacial cleft cases by combining NSCLP, NSCLO and NSCPO together; NSCL/P, non-syndromic cleft lip with or without palate (NSCLP&NSCLO); NSCLP, non-syndromic cleft lip and palate; NSCLO, non-syndromic cleft lip only; NSCPO, non-syndromic cleft palate only. \*, Individuals of the trios from Geneva study (Asian and European).

Supplementary Table 3. Cohort Studies Description, Genotypes

Descriptive genotyping statistics for studies that contributed to the GWAS meta-analysis, see column description under the table. Tests for deviation from Hardy Weinberg are 2-tailed.

| Study             | Genotyping array(s)                           | Sample quality control |                                                                                                                                                                                               |          | SNP scaffold quality control |             |            | Prephasing software | Imputation Software            | Reference panel | Association analysis                                                                                                                                                                         |                          |          | Lambda   |         |         |
|-------------------|-----------------------------------------------|------------------------|-----------------------------------------------------------------------------------------------------------------------------------------------------------------------------------------------|----------|------------------------------|-------------|------------|---------------------|--------------------------------|-----------------|----------------------------------------------------------------------------------------------------------------------------------------------------------------------------------------------|--------------------------|----------|----------|---------|---------|
|                   |                                               | Call rate              | Additional filters                                                                                                                                                                            |          | Call rate                    | HWE P-value | MAF        |                     |                                |                 | Software                                                                                                                                                                                     | Covariates or adjustment | NSOC     | NSCLP    | NSCLP   | NSCLO   |
| CHW_Axiom         | Affymetrix Axiom CHB                          | >98%                   | relatedness, sex discrepancy                                                                                                                                                                  | >98%     | >1e-6                        | >1%         | Eagle v2.4 | Minimac4            | 1000 genomes phase 3           | SNPTEST         | PC1-10; Sex                                                                                                                                                                                  | 1.03093                  | 1.030716 | 1.03536  | 0.98202 | --      |
| CHE_Axiom&HSA     | Affymetrix Axiom CHB; Affymetrix Human SNP A1 | >98%                   | relatedness, nsex discrepancy                                                                                                                                                                 | >98%     | >1e-6                        | >1%         | Eagle v2.4 | Minimac4            | 1000 genomes phase 3           | SNPTEST         | PC1-10; Sex                                                                                                                                                                                  | --                       | 1.049698 | 1.040456 | NA      | --      |
| CHS_ZH            | Illumina HumanOmniZhongHua-8 BeadChip         | >98%                   | relatedness, sex discrepancy                                                                                                                                                                  | >98%     | >1e-6                        | >1%         | Eagle v2.4 | Minimac4            | 1000 genomes phase 3           | regenie         | PC1-10                                                                                                                                                                                       | 1.109684                 | --       | 1.091924 | --      | 1.0463  |
| CHW_ZH            | Illumina HumanOmniZhongHua-8 BeadChip         | >98%                   | relatedness, sex discrepancy                                                                                                                                                                  | >98%     | >1e-6                        | >1%         | Eagle v2.4 | Minimac4            | 1000 genomes phase 3           | SNPTEST         | PC1-10; Sex                                                                                                                                                                                  | 1.015681                 | 1.044482 | --       | 1.0485  | 1.00343 |
| Huang et al. 2019 | Illumina HumanOmniZhongHua-8 BeadChip         | None                   | relatedness                                                                                                                                                                                   | >90%     | >1e-6                        | >1%         | SHAPEIT2   | Minimac3            | 1000 Genomes phase 1 (vc PLINK |                 | PC1-4; Sex                                                                                                                                                                                   | --                       | --       | --       | 1.031   | 1.016   |
| Butali et al.2019 | Illumina MEGA v2 15070954 A2                  | None                   | batch effects, identification of large chromosomal anomalies, confirmation of relatedness (i.e. identity by descent) and establishment of continental ancestry with respect to HapMap samples | >98%     | > 10 <sup>-3</sup>           | >1%         | IMPUTE2    | IMPUTE2             | 1000 genomes phase 3           | GMAAT package   | population structure (the first seven eigenvectors of the genotypes), relationships between participants (using the computed genetic relatedness matrix) and covariates (sex and study site) | --                       | --       | 0.996    | --      | 1       |
| POFC1             | Illumina HumanCore+Exome array                |                        |                                                                                                                                                                                               | > 0.0001 |                              | >1%         | SHAPEIT2   | IMPUTE2             | 1000 Genomes Phase 3           | PLINK           | Genetic relationship matrix                                                                                                                                                                  | 0.975035                 | 0.987923 | 0.998601 | 1.08958 | 1.01313 |
| GENEVA            | Illumina Human610-Quadv.1 B BeadChip          |                        |                                                                                                                                                                                               | > 0.0001 |                              | >1%         | SHAPEIT    | IMPUTE2             | 1000 Genomes Phase 1           | PLINK           |                                                                                                                                                                                              | 1.017371                 | 1.020683 | 1.017371 | 1.00842 | 0.99534 |

Note: NSOC, non-syndromic orofacial cleft cases by combining NSCLP, NSCLO and NSCPO together; NSCLP, non-syndromic cleft lip with or without palate (NSCLP&amp;NSCLO); NSCLP, non-syndromic cleft lip and palate; NSCLO, non-syndromic cleft lip only; NSCPO, non-syndromic cleft palate only

| Column                       | Description                                                                             |
|------------------------------|-----------------------------------------------------------------------------------------|
| Study                        | The abbreviated name of the contributing study                                          |
| Genotyping array(s)          | The genotyping array used                                                               |
| Sample quality control       | Call rate and other quality control filters                                             |
| SNP scaffold quality control | SNP filters (HWE: Hardy-Weinberg equilibrium; MAF: minor allele frequency)              |
| Prephasing software          | Name and version of the software used for genotypes prephasing                          |
| Imputation                   | Software and reference panel used for genotypes imputation                              |
| Association analysis         | Software and general covariates used for association analyses (PC: principal component) |
| Lambda                       | Inflation factor (lambda) for the adjusted GWASes                                       |





|             |                    |           |                 |                   |             |          |             |                 |              |             |                 |                |              |                   |
|-------------|--------------------|-----------|-----------------|-------------------|-------------|----------|-------------|-----------------|--------------|-------------|-----------------|----------------|--------------|-------------------|
| NSCLP       | <b>PAX9</b>        | <b>14</b> | <b>37514564</b> | <b>rs10150336</b> | <b>A</b>    | <b>T</b> | <b>0.5</b>  | <b>4.74E-08</b> | <b>1</b>     | <b>0.5</b>  | <b>4.74E-08</b> | <b>0.00035</b> | <b>0.025</b> | <b>Known Loci</b> |
| NSCLP       | <i>LINC00640</i>   | 14        | 51855553        | rs4901116         | T           | G        | 0.63        | 6.54E-14        | 0.78         | 0.37        | 4.63E-12        | 0.13           | 0.72         | Known SNP         |
| NSCLP       | <i>LINC00640</i>   | 14        | 51856064        | rs144433632       | AAT         | A        | 0.44        | 1.20E-10        | 1            | 0.44        | 1.20E-10        | 0.31           | 0.99         | Known Loci        |
| NSCLP       | <i>GSC</i>         | 14        | 95378540        | rs61665130        | T           | TG       | 0.52        | 4.78E-08        | 1            | 0.48        | 4.78E-08        | 0.047          | 0.084        | Known Loci        |
| NSCLP       | <i>GSC</i>         | 14        | 95378540        | rs61665130        | T           | TG       | 0.5         | 5.33E-09        | 1            | 0.5         | 5.33E-09        | 0.015          | 0.56         | Known Loci        |
| <b>NSOC</b> | <i>UBL7-AS1</i>    | 15        | 74759689        | rs559701024       | CT          | C        | 0.6         | 1.72E-08        | 1            | 0.4         | 1.72E-08        | 0.29           | 0.87         | Known Loci        |
| NSCLP       | <i>UBL7-AS1</i>    | 15        | 74759689        | rs559701024       | CT          | C        | 0.59        | 6.78E-14        | 1            | 0.41        | 6.78E-14        | 0.033          | 0.36         | Known Loci        |
| NSCLP       | <i>UBL7-AS1</i>    | 15        | 74759689        | rs559701024       | CT          | C        | 0.59        | 2.07E-12        | 1            | 0.41        | 2.07E-12        | 0.062          | 0.17         | Known Loci        |
| <b>NSOC</b> | <i>CREBBP</i>      | 16        | 3963187         | rs9923088         | C           | G        | 0.43        | 5.45E-10        | 1            | 0.57        | 5.45E-10        | 0.054          | 0.51         | Known Loci        |
| NSCLP       | <i>CREBBP</i>      | 16        | 3963187         | rs9923088         | C           | G        | 0.42        | 2.25E-15        | 1            | 0.58        | 2.25E-15        | 0.061          | 0.8          | Known Loci        |
| NSCLP       | <i>CREBBP</i>      | 16        | 3963187         | rs9923088         | C           | G        | 0.44        | 5.98E-10        | 1            | 0.56        | 5.98E-10        | 0.1            | 0.53         | Known Loci        |
| NSCLP       | <i>NTN1</i>        | 17        | 8930279         | rs35023427        | T           | TA       | 0.72        | 1.66E-08        | 1            | 0.28        | 1.66E-08        | 0.053          | 0.49         | Known Loci        |
| NSCLO       | <i>NTN1</i>        | 17        | 8943063         | rs9911652         | T           | C        | 0.82        | 3.14E-10        | 0.064        | 0.18        | 7.64E-08        | 0.16           | 0.4          | Known Loci        |
| <b>NSOC</b> | <i>NTN1</i>        | 17        | 8947708         | rs12944377        | C           | T        | 0.43        | 3.55E-24        | 0.063        | 0.57        | 1.91E-17        | 0.006          | 0.54         | Known SNP         |
| NSCLP       | <b><i>NTN1</i></b> | <b>17</b> | <b>8947708</b>  | <b>rs12944377</b> | <b>C</b>    | <b>T</b> | <b>0.43</b> | <b>2.66E-26</b> | <b>0.001</b> | <b>0.57</b> | <b>1.21E-17</b> | <b>0.00025</b> | <b>0.086</b> | <b>Known SNP</b>  |
| NSCLP       | <i>NTN1</i>        | 17        | 8947708         | rs12944377        | C           | T        | 0.63        | 1.58E-25        | 0.004        | 0.63        | 2.60E-18        | 0.45           | 0.16         | Known SNP         |
| NSCLP       | <i>WNT9B</i>       | 17        | 44993128        | rs4968248         | G           | A        | 0.53        | 3.19E-14        | 0.84         | 0.47        | 2.03E-12        | 0.63           | 0.52         | Known Loci        |
| NSCLP       | <i>WNT9B</i>       | 17        | 45005703        | rs3785888         | C           | T        | 0.48        | 5.42E-12        | 0.62         | 0.48        | 3.68E-11        | 0.39           | 0.8          | Known Loci        |
| <b>NSOC</b> | <i>WNT9B</i>       | 17        | 45042079        | rs3760377         | A           | G        | 0.5         | 2.35E-11        | 0.47         | 0.5         | 3.38E-09        | 0.84           | 0.52         | Known Loci        |
| NSCLP       | <i>NOG</i>         | 17        | 54773238        | rs227731          | G           | T        | 0.62        | 2.92E-14        | 0.14         | 0.38        | 4.34E-11        | 0.018          | 0.46         | Known SNP         |
| NSCLP       | <i>NOG</i>         | 17        | 54773238        | rs227731          | G           | T        | 0.36        | 2.23E-08        | 0.59         | 0.35        | 4.88E-07        | 0.62           | 0.33         | Known SNP         |
| <b>NSOC</b> | <i>NOG</i>         | 17        | 54776955        | rs227727          | T           | A        | 0.62        | 1.57E-10        | 0.9          | 0.38        | 2.39E-09        | 0.017          | 0.12         | Known Loci        |
| <b>NSOC</b> | <i>RHPN2</i>       | 19        | 33515581        | rs145403118       | C           | CT       | 0.85        | 4.85E-10        | 1            | 0.15        | 4.85E-10        | 0.038          | 0.31         | Known Loci        |
| NSCLP       | <i>RHPN2</i>       | 19        | 33515581        | rs145403118       | C           | CT       | 0.85        | 2.45E-16        | 1            | 0.15        | 2.45E-16        | 0.013          | 0.96         | Known Loci        |
| NSCLP       | <i>RHPN2</i>       | 19        | 33517152        | rs28570619        | A           | G        | 0.88        | 8.92E-14        | 1            | 0.12        | 8.91E-14        | 1              | 0.7          | Known Loci        |
| <b>NSOC</b> | <i>RHPN2</i>       | 19        | 33525145        | rs10409307        | A           | G        | 0.53        | 3.61E-08        | 1            | 0.47        | 3.61E-08        | 0.92           | 0.42         | Known Loci        |
| NSCLP       | <i>RHPN2</i>       | 19        | 33525145        | rs10409307        | A           | G        | 0.53        | 1.53E-09        | 1            | 0.47        | 1.53E-09        | 0.68           | 0.34         | Known Loci        |
| NSCLP       | <i>RHPN2</i>       | 19        | 33545042        | rs12462348        | T           | C        | 0.68        | 1.59E-08        | 0.99         | 0.32        | 1.36E-07        | 0.095          | 0.62         | Known Loci        |
| NSCLO       | <i>MAFB</i>        | 20        | 39265737        | rs6029242         | T           | C        | 0.48        | 1.25E-09        | 0.54         | 0.52        | 2.63E-08        | 0.007          | 0.33         | Known Loci        |
| NSCLP       | <i>MAFB</i>        | 20        | 39270795        | rs6124259         | G           | A        | 0.6         | 3.73E-17        | 0.011        | 0.39        | 2.84E-12        | 0.031          | 0.64         | Known Loci        |
| <b>NSOC</b> | <i>MAFB</i>        | 20        | 39272739        | rs4812449         | G           | C        | 0.55        | 2.46E-15        | 1            | 0.45        | 2.45E-15        | 0.006          | 0.05         | Known Loci        |
| NSCLP       | <b><i>MAFB</i></b> | <b>20</b> | <b>39274534</b> | <b>rs71193616</b> | <b>GGGA</b> | <b>G</b> | <b>0.63</b> | <b>1.25E-12</b> | <b>1</b>     | <b>0.37</b> | <b>1.25E-12</b> | <b>0.00013</b> | <b>0.28</b>  | <b>Known Loci</b> |
| NSCLP       | <i>MAFB</i>        | 20        | 39281629        | rs6102085         | G           | A        | 0.48        | 2.35E-14        | 0.006        | 0.48        | 7.67E-10        | 0.008          | 0.28         | Known SNP         |
| <b>NSOC</b> | <i>ERG</i>         | 21        | 40031924        | rs9647180         | T           | C        | 0.76        | 3.58E-09        | 1            | 0.24        | 3.58E-09        | 0.75           | 0.37         | Known Loci        |
| NSCLP       | <i>ERG</i>         | 21        | 40034216        | rs59685837        | GA          | G        | 0.76        | 6.86E-09        | 1            | 0.24        | 6.86E-09        | 0.75           | 0.96         | Known Loci        |
| NSCLP       | <i>ARVCF</i>       | 22        | 19972118        | rs9606203         | A           | C        | 0.81        | 1.42E-08        | 0.57         | 0.19        | 3.48E-07        | 0.004          | 0.18         | Known Loci        |
| NSCLP       | <i>ARVCF</i>       | 22        | 19976845        | rs756653          | A           | G        | 0.81        | 3.00E-11        | 0.44         | 0.19        | 2.78E-09        | 0.008          | 0.54         | Known SNP         |
| NSCLP       | <i>ARHGAP8</i>     | 22        | 45150659        | rs7565956         | T           | C        | 0.52        | 2.24E-08        | 0.006        | 0.48        | 3.97E-05        | 0.21           | 0.31         | Known Loci        |

Note: The known loci is defined as its location within 1Mb from previous GWASs reported SNP.NSOC, non-syndromic orofacial cleft cases by combining NSCLP,NSCLO and NSCPO together; NSCLP, non-syndromic cleft lip with or without palate (NSCLP&NSCLO); NSCLP, non-syndromic cleft lip and palate; NSCLO, non-syndromic cleft lip only; NSCPO, non-syndromic cleft palate only;EA, effect allele; OA, othr allele; CC, Case-control design Study; TDT, Transmission disequilibrium test; pHET, P-value for heterogeneity;pHET-ANC: P-value for heterogeneity correlated with ancestry. pHET-RES: P-value for residual heterogeneity.

Supplementary Table 5. Functional Annotation on the lead SNPs by VEP from Ensemble

| Classification | Locus Name       | Chromosome | Position(b37) | rsid        | Function   | Feature_type                              | BIOTYPE                                                                                                                 | Consequence                                                                                                                                                               |
|----------------|------------------|------------|---------------|-------------|------------|-------------------------------------------|-------------------------------------------------------------------------------------------------------------------------|---------------------------------------------------------------------------------------------------------------------------------------------------------------------------|
| Novel          | <i>NTRK1</i>     | 1          | 156839414     | rs4661229   | intronic   | Transcript;RegulatoryFeature              | protein_coding;protein_coding_CDS_not_defined;nonsense_mediated_decay;retained_intron;CTCF_binding_site;enhancer        | downstream_gene_variant;intron_variant;intron_variant;non_coding_transcript_variant;intron_variant;NMD_transcript_variant;regulatory_region_variant                       |
| Novel          | <i>HMGCR</i>     | 2          | 219817037     | rs13011262  | -          | -                                         | -                                                                                                                       | intergenic_variant                                                                                                                                                        |
| Novel          | <i>CALD1</i>     | 7          | 134845630     | rs4732060   | intronic   | Transcript;RegulatoryFeature;MotifFeature | protein_coding;nonsense_mediated_decay;retained_intron;protein_coding_CDS_not_defined;lncRNA;enhancer;CTCF_binding_site | intron_variant;intron_variant;NMD_transcript_variant;intron_variant;non_coding_transcript_variant;upstream_gene_variant;regulatory_region_variant;TF_binding_site_variant |
| Novel          | <i>CALD1</i>     | 7          | 134877068     | rs10488465  | intronic   | Transcript                                | protein_coding;nonsense_mediated_decay;retained_intron;protein_coding_CDS_not_defined;lncRNA                            | intron_variant;intron_variant;NMD_transcript_variant;intron_variant;non_coding_transcript_variant                                                                         |
| Novel          | <i>SHH</i>       | 7          | 156026696     | rs4716972   | -          | Transcript                                | lncRNA                                                                                                                  | downstream_gene_variant;intron_variant;non_coding_transcript_variant                                                                                                      |
| Novel          | <i>NRG1</i>      | 8          | 32493817      | rs17645417  | intronic   | Transcript                                | protein_coding;protein_coding_CDS_not_defined;nonsense_mediated_decay                                                   | intron_variant;intron_variant;non_coding_transcript_variant;intron_variant;NMD_transcript_variant                                                                         |
| Novel          | <i>PRICKLE1</i>  | 12         | 42488641      | rs12817499  | intronic   | Transcript                                | protein_coding;lncRNA;protein_coding_CDS_not_defined                                                                    | intron_variant;upstream_gene_variant;intron_variant;non_coding_transcript_variant                                                                                         |
| Novel          | <i>ALX1</i>      | 12         | 85585770      | rs565838209 | -          | Transcript                                | lncRNA                                                                                                                  | intron_variant;non_coding_transcript_variant                                                                                                                              |
| Novel          | <i>SOX9</i>      | 17         | 72283506      | rs62069766  | -          | RegulatoryFeature                         | open_chromatin_region                                                                                                   | regulatory_region_variant;intergenic_variant                                                                                                                              |
| Novel          | <i>LINC00320</i> | 21         | 20793565      | rs13052576  | intronic   | Transcript;RegulatoryFeature              | lncRNA;enhancer                                                                                                         | intron_variant;non_coding_transcript_variant;regulatory_region_variant                                                                                                    |
| Novel          | <i>RUNX1</i>     | 21         | 34831549      | rs2246738   | intronic   | Transcript                                | protein_coding;retained_intron;protein_coding_CDS_not_defined;nonsense_mediated_decay;lncRNA                            | intron_variant;downstream_gene_variant;upstream_gene_variant;intron_variant;NMD_transcript_variant                                                                        |
| Novel          | <i>MYH9</i>      | 22         | 36288285      | rs5756130   | synonymous | Transcript;RegulatoryFeature              | protein_coding;protein_coding_CDS_not_defined;retained_intron;miRNA;enhancer                                            | synonymous_variant;upstream_gene_variant;non_coding_transcript_exon_variant;regulatory_region_variant;intergenic_variant                                                  |
| Known SNP      | <i>PAX7</i>      | 1          | 18972776      | rs9439713   | -          | Transcript                                | protein_coding                                                                                                          | intron_variant                                                                                                                                                            |
| Known SNP      | <i>ARHGAP29</i>  | 1          | 94558110      | rs66515264  | Intronic   | Transcript                                | protein_coding                                                                                                          | intron_variant                                                                                                                                                            |
| Known SNP      | <i>IRF6</i>      | 1          | 209989092     | rs72741048  | -          | RegulatoryFeature                         | enhancer                                                                                                                | regulatory_region_variant;intergenic_variant                                                                                                                              |
| Known SNP      | <i>IRF6</i>      | 1          | 209989270     | rs642961    | -          | RegulatoryFeature                         | enhancer                                                                                                                | regulatory_region_variant;intergenic_variant                                                                                                                              |
| Known SNP      | <i>IRF6</i>      | 1          | 209992501     | rs1109430   | -          | -                                         | -                                                                                                                       | intergenic_variant                                                                                                                                                        |
| Known SNP      | <i>IRF6</i>      | 1          | 210048819     | rs2064163   | -          | RegulatoryFeature                         | enhancer;CTCF_binding_site                                                                                              | regulatory_region_variant;intergenic_variant                                                                                                                              |
| Known SNP      | <i>FAM49A</i>    | 2          | 16713395      | rs6745357   | Intronic   | Transcript                                | lncRNA                                                                                                                  | downstream_gene_variant;intron_variant;non_coding_transcript_variant                                                                                                      |
| Known SNP      | ZFX4             | 8          | 77496113      | rs11993273  | Intronic   | Transcript                                | lncRNA                                                                                                                  | intron_variant;non_coding_transcript_variant;upstream_gene_variant                                                                                                        |
| Known SNP      | <i>LINC00824</i> | 8          | 129964873     | rs17242358  | -          | Transcript                                | lncRNA                                                                                                                  | downstream_gene_variant;intron_variant;non_coding_transcript_variant                                                                                                      |
| Known SNP      | <i>LINC00824</i> | 8          | 129976136     | rs55658222  | Intronic   | Transcript                                | lncRNA                                                                                                                  | intron_variant;non_coding_transcript_variant                                                                                                                              |
| Known SNP      | <i>VAX1</i>      | 10         | 118846294     | rs10886040  | Intronic   | RegulatoryFeature;Transcript              | enhancer;protein_coding                                                                                                 | regulatory_region_variant;intron_variant                                                                                                                                  |
| Known SNP      | <i>SPRY2</i>     | 13         | 80679302      | rs11841646  | -          | -                                         | -                                                                                                                       | intergenic_variant                                                                                                                                                        |
| Known SNP      | <i>LINC00640</i> | 14         | 51855553      | rs4901116   | Intronic   | Transcript                                | lncRNA                                                                                                                  | downstream_gene_variant;intron_variant;non_coding_transcript_variant;upstream_gene_variant                                                                                |
| Known SNP      | <i>NTN1</i>      | 17         | 8947708       | rs12944377  | Intronic   | Transcript                                | protein_coding                                                                                                          | intron_variant                                                                                                                                                            |
| Known SNP      | <i>NOG</i>       | 17         | 54773238      | rs227731    | -          | -                                         | -                                                                                                                       | intergenic_variant                                                                                                                                                        |
| Known SNP      | <i>MAFB</i>      | 20         | 39281629      | rs6102085   | -          | -                                         | -                                                                                                                       | intergenic_variant                                                                                                                                                        |
| Known SNP      | <i>ARVCF</i>     | 22         | 19976845      | rs756653    | Intronic   | Transcript                                | protein_coding;protein_coding_CDS_not_defined;retained_intron                                                           | intron_variant;upstream_gene_variant;intron_variant;non_coding_transcript_variant                                                                                         |
| Known Loci     | <i>PAX7</i>      | 1          | 18957297      | rs569017380 | -          | Transcript;RegulatoryFeature              | protein_coding;promoter                                                                                                 | upstream_gene_variant;regulatory_region_variant                                                                                                                           |
| Known Loci     | <i>GRHL3</i>     | 1          | 24667423      | rs12568609  | Intronic   | Transcript;RegulatoryFeature              | protein_coding;retained_intron;protein_coding_CDS_not_defined;enhancer                                                  | intron_variant;intron_variant;non_coding_transcript_variant;downstream_gene_variant;regulatory_region_variant                                                             |

|            |                 |   |           |             |          |                              |                                                                                                                         |                                                                                                                                                                         |
|------------|-----------------|---|-----------|-------------|----------|------------------------------|-------------------------------------------------------------------------------------------------------------------------|-------------------------------------------------------------------------------------------------------------------------------------------------------------------------|
| Known Loci | <i>FGGY</i>     | 1 | 59421811  | rs35110579  | intronic | Transcript;RegulatoryFeature | protein_coding;nonsense_m<br>ediated_decay;protein_codi<br>ng_CDS_not_defined;retain<br>ed_intron;misc_RNA;enhan<br>cer | intron_variant;intron_vari<br>ant;NMD_transcript_varian<br>t;intron_variant;non_coding_tra<br>nscript_variant;5_prime_UT<br>R_variant;regulatory_region<br>_variant     |
| Known Loci | <i>FGGY</i>     | 1 | 59422001  | rs11577647  | intronic | Transcript                   | protein_coding;nonsense_m<br>ediated_decay;protein_codi<br>ng_CDS_not_defined;retain<br>ed_intron;misc_RNA              | intron_variant;intron_vari<br>ant;NMD_transcript_varian<br>t;intron_variant;non_coding_tra<br>nscript_variant;5_prime_UT<br>R_variant                                   |
| Known Loci | <i>ARHGAP29</i> | 1 | 94601200  | rs138088826 | -        | -                            | -                                                                                                                       | intergenic_variant                                                                                                                                                      |
| Known Loci | <i>ARHGAP29</i> | 1 | 94606077  | rs7551877   | -        | Transcript                   | lncRNA                                                                                                                  | upstream_gene_variant                                                                                                                                                   |
| Known Loci | <i>ARHGAP29</i> | 1 | 94615394  | rs11290844  | Exonic   | Transcript                   | lncRNA;retained_intron;no<br>nonsense_mediated_decay;mis<br>c_RNA                                                       | downstream_gene_variant;n<br>on_coding_transcript_exon_<br>variant;downstream_gene_v<br>ariant;upstream_gene_varian<br>t                                                |
| Known Loci | <i>IRF6</i>     | 1 | 209894822 | rs201481822 | Intronic | Transcript;RegulatoryFeature | protein_coding;lncRNA;en<br>hancer                                                                                      | intron_variant;intron_vari<br>ant;non_coding_transcript_vari<br>ant;regulatory_region_varia<br>nt                                                                       |
| Known Loci | <i>IRF6</i>     | 1 | 209913473 | rs12120361  | -        | Transcript                   | processed_pseudogene                                                                                                    | upstream_gene_variant                                                                                                                                                   |
| Known Loci | <i>IRF6</i>     | 1 | 209943893 | rs139818084 | Intronic | Transcript;RegulatoryFeature | protein_coding;retained_intr<br>on;nonsense_mediated_dec<br>ay;CTCF_binding_site;pro<br>moter                           | intron_variant;intron_vari<br>ant;non_coding_transcript_vari<br>ant;intron_variant;NMD_tra<br>nscript_variant;regulatory_r<br>egion_variant                             |
| Known Loci | <i>IRF6</i>     | 1 | 209974232 | rs622832    | Intronic | Transcript                   | protein_coding;nonsense_m<br>ediated_decay                                                                              | intron_variant;intron_vari<br>ant;NMD_transcript_varian<br>t                                                                                                            |
| Known Loci | <i>IRF6</i>     | 1 | 209982738 | rs17015255  | -        | Transcript                   | protein_coding;nonsense_m<br>ediated_decay                                                                              | upstream_gene_variant                                                                                                                                                   |
| Known Loci | <i>IRF6</i>     | 1 | 210043322 | rs3028171   | -        | RegulatoryFeature            | enhancer                                                                                                                | regulatory_region_variant;in<br>tergenic_variant                                                                                                                        |
| Known Loci | <i>IRF6</i>     | 1 | 210248548 | rs4844943   | Intronic | Transcript                   | protein_coding;nonsense_m<br>ediated_decay                                                                              | intron_variant;intron_vari<br>ant;NMD_transcript_varian<br>t                                                                                                            |
| Known Loci | <i>IRF6</i>     | 1 | 210253684 | rs10863809  | Intronic | Transcript                   | protein_coding;nonsense_m<br>ediated_decay                                                                              | intron_variant;intron_vari<br>ant;NMD_transcript_varian<br>t                                                                                                            |
| Known Loci | <i>IRF6</i>     | 1 | 210301331 | rs7516554   | Intronic | Transcript                   | protein_coding;nonsense_m<br>ediated_decay                                                                              | intron_variant;intron_vari<br>ant;NMD_transcript_varian<br>t                                                                                                            |
| Known Loci | <i>IRF6</i>     | 1 | 210352641 | rs2485896   | -        | -                            | -                                                                                                                       | intergenic_variant                                                                                                                                                      |
| Known Loci | <i>IRF6</i>     | 1 | 210355896 | rs12087757  | -        | -                            | -                                                                                                                       | intergenic_variant                                                                                                                                                      |
| Known Loci | <i>IRF6</i>     | 1 | 210372114 | rs2494175   | -        | -                            | -                                                                                                                       | intergenic_variant                                                                                                                                                      |
| Known Loci | <i>TAF1B</i>    | 2 | 9967620   | rs528634626 | -        | -                            | -                                                                                                                       | intergenic_variant                                                                                                                                                      |
| Known Loci | <i>TAF1B</i>    | 2 | 10028440  | rs71389302  | Intronic | Transcript                   | nonsense_mediated_decay;<br>protein_coding                                                                              | intron_variant;NMD_transc<br>ript_variant;intron_varian<br>t                                                                                                            |
| Known Loci | <i>FAM49A</i>   | 2 | 16705500  | rs140385594 | Intronic | Transcript                   | lncRNA                                                                                                                  | intron_variant;non_coding_t<br>ranscript_variant                                                                                                                        |
| Known Loci | <i>FAM49A</i>   | 2 | 16733525  | rs5007483   | Exonic   | Transcript                   | protein_coding;lncRNA                                                                                                   | 3_prime_UTR_variant;dow<br>nstream_gene_variant;intron<br>_variant;non_coding_transc<br>ript_variant                                                                    |
| Known Loci | <i>HYAL2</i>    | 3 | 50281058  | rs11434969  | intronic | Transcript                   | protein_coding;retained_intr<br>on;protein_coding_CDS_n<br>ot_defined;misc_RNA                                          | intron_variant;downstream_<br>gene_variant                                                                                                                              |
| Known Loci | <i>ADAMTS9</i>  | 3 | 64627602  | rs6445418   | intronic | Transcript;RegulatoryFeature | protein_coding;retained_intr<br>on;misc_RNA;enhancer                                                                    | intron_variant;intron_vari<br>ant;non_coding_transcript_vari<br>ant;regulatory_region_varia<br>nt                                                                       |
| Known Loci | <i>ADAMTS9</i>  | 3 | 64630197  | rs9838262   | intronic | Transcript                   | protein_coding;retained_intr<br>on;misc_RNA                                                                             | intron_variant;intron_vari<br>ant;non_coding_transcript_vari<br>ant                                                                                                     |
| Known Loci | <i>FILIP1L</i>  | 3 | 99680753  | rs11290599  | Intronic | Transcript;RegulatoryFeature | protein_coding;nonsense_m<br>ediated_decay;protein_codi<br>ng_CDS_not_defined;miR<br>NA;enhancer                        | intron_variant;intron_vari<br>ant;NMD_transcript_varian<br>t;intron_variant;non_coding_tra<br>nscript_variant;downstream_<br>gene_variant;regulatory_re<br>gion_variant |
| Known Loci | <i>TP63</i>     | 3 | 189544776 | rs75834417  | Intronic | Transcript                   | protein_coding;miRNA;reta<br>ined_intron                                                                                | intron_variant;upstream_gen<br>e_variant;intron_variant;non_<br>coding_transcript_variant                                                                               |
| Known Loci | <i>TP63</i>     | 3 | 189549082 | rs79792381  | Intronic | Transcript                   | protein_coding;miRNA;reta<br>ined_intron                                                                                | intron_variant;downstream_<br>gene_variant;intron_variant;<br>non_coding_transcript_varia<br>nt                                                                         |
| Known Loci | <i>TP63</i>     | 3 | 189551340 | rs55660938  | Intronic | Transcript;RegulatoryFeature | protein_coding;miRNA;reta<br>ined_intron;open_chromatin_<br>region                                                      | intron_variant;downstream_<br>gene_variant;intron_variant;<br>non_coding_transcript_varia<br>nt;regulatory_region_varian<br>t                                           |
| Known Loci | <i>NNT</i>      | 5 | 43856675  | rs34871596  | -        | -                            | -                                                                                                                       | intergenic_variant                                                                                                                                                      |
| Known Loci | <i>NNT</i>      | 5 | 43862510  | rs34378343  | -        | -                            | -                                                                                                                       | intergenic_variant                                                                                                                                                      |
| Known Loci | <i>GMDS</i>     | 6 | 1944939   | rs11242726  | Intronic | Transcript                   | protein_coding;protein_codi<br>ng_CDS_not_defined                                                                       | intron_variant;intron_vari<br>ant;non_coding_transcript_vari<br>ant                                                                                                     |

|            |                  |    |           |             |          |                                           |                                                                                                |                                                                                                                                                                           |
|------------|------------------|----|-----------|-------------|----------|-------------------------------------------|------------------------------------------------------------------------------------------------|---------------------------------------------------------------------------------------------------------------------------------------------------------------------------|
| Known Loci | <i>GMD5</i>      | 6  | 1960651   | rs140236874 | Intronic | Transcript                                | protein_coding;retained_intron;protein_coding_CDS_not_defined                                  | intron_variant;intron_variant;non_coding_transcript_variant                                                                                                               |
| Known Loci | <i>ZFXH4</i>     | 8  | 77498222  | rs144305105 | Intronic | Transcript                                | lncRNA                                                                                         | intron_variant;non_coding_transcript_variant                                                                                                                              |
| Known Loci | <i>DCAF4L2</i>   | 8  | 88946414  | rs5893033   | -        | -                                         | -                                                                                              | intergenic_variant                                                                                                                                                        |
| Known Loci | <i>RIPK2</i>     | 8  | 90232609  | rs141180188 | -        | -                                         | -                                                                                              | intergenic_variant                                                                                                                                                        |
| Known Loci | <i>VIRMA</i>     | 8  | 95503542  | rs58089312  | Intronic | Transcript                                | protein_coding;nonsense_mediated_decay;retained_intron                                         | intron_variant;intron_variant;NMD_transcript_variant;intron_variant;non_coding_transcript_variant;downstream_gene_variant                                                 |
| Known Loci | <i>VIRMA</i>     | 8  | 95663822  | rs10089502  | Intronic | Transcript                                | protein_coding;retained_intron;nonsense_mediated_decay;misc_RNA                                | intron_variant;intron_variant;non_coding_transcript_variant;intron_variant;NMD_transcript_variant;upstream_gene_variant                                                   |
| Known Loci | <i>VIRMA</i>     | 8  | 95739642  | rs67763258  | Intronic | Transcript                                | protein_coding;nonsense_mediated_decay                                                         | intron_variant;intron_variant;NMD_transcript_variant                                                                                                                      |
| Known Loci | <i>LINC00824</i> | 8  | 129699660 | rs7839784   | Intronic | Transcript                                | lncRNA                                                                                         | intron_variant;non_coding_transcript_variant                                                                                                                              |
| Known Loci | <i>LINC00824</i> | 8  | 129703990 | rs35379093  | Intronic | Transcript                                | lncRNA                                                                                         | intron_variant;non_coding_transcript_variant                                                                                                                              |
| Known Loci | <i>LINC00824</i> | 8  | 129911532 | rs10631848  | Intronic | Transcript;RegulatoryFeature              | lncRNA;enhancer                                                                                | intron_variant;non_coding_transcript_variant;regulatory_region_variant                                                                                                    |
| Known Loci | <i>LINC00824</i> | 8  | 129950399 | rs1372450   | Intronic | Transcript;RegulatoryFeature              | lncRNA;open_chromatin_region                                                                   | intron_variant;non_coding_transcript_variant;regulatory_region_variant                                                                                                    |
| Known Loci | <i>GADD45G</i>   | 9  | 92210595  | rs7024024   | Intronic | Transcript                                | lncRNA                                                                                         | downstream_gene_variant;intron_variant;non_coding_transcript_variant                                                                                                      |
| Known Loci | <i>GADD45G</i>   | 9  | 92211862  | rs10429497  | Intronic | Transcript                                | lncRNA                                                                                         | downstream_gene_variant;intron_variant;non_coding_transcript_variant                                                                                                      |
| Known Loci | <i>PTCH1</i>     | 9  | 98225056  | rs28377268  | Intronic | Transcript;MotifFeature;RegulatoryFeature | nonsense_mediated_decay;promoter;protein_coding;protein_coding_CDS_not_defined;retained_intron | intron_variant;NMD_transcript_variant;regulatory_region_variant;intron_variant;upstream_gene_variant;downstream_gene_variant                                              |
| Known Loci | <i>FOXE1</i>     | 9  | 100508754 | rs541315146 | Intronic | Transcript                                | lncRNA                                                                                         | downstream_gene_variant;intron_variant;non_coding_transcript_variant                                                                                                      |
| Known Loci | <i>FOXE1</i>     | 9  | 100619090 | rs35060625  | -        | Transcript                                | lncRNA;protein_coding                                                                          | upstream_gene_variant;downstream_gene_variant                                                                                                                             |
| Known Loci | <i>NR6A1</i>     | 9  | 127369279 | rs77346093  | Intronic | Transcript                                | misc_RNA;protein_coding                                                                        | upstream_gene_variant;intron_variant                                                                                                                                      |
| Known Loci | <i>VAX1</i>      | 10 | 118831210 | rs10886037  | Intronic | RegulatoryFeature;Transcript              | enhancer;protein_coding                                                                        | regulatory_region_variant;intron_variant                                                                                                                                  |
| Known Loci | <i>VAX1</i>      | 10 | 118836682 | rs11197887  | Intronic | Transcript                                | protein_coding                                                                                 | intron_variant                                                                                                                                                            |
| Known Loci | <i>VAX1</i>      | 10 | 118850264 | rs17095834  | Intronic | RegulatoryFeature;Transcript              | open_chromatin_region;protein_coding                                                           | regulatory_region_variant;intron_variant                                                                                                                                  |
| Known Loci | <i>LGR5</i>      | 12 | 71967309  | rs67687642  | Intronic | Transcript                                | protein_coding;retained_intron                                                                 | intron_variant;downstream_gene_variant;intron_variant;non_coding_transcript_variant                                                                                       |
| Known Loci | <i>CLYBL</i>     | 13 | 100512107 | rs9557318   | Intronic | RegulatoryFeature;Transcript              | enhancer;lncRNA;nonsense_mediated_decay;protein_coding                                         | regulatory_region_variant;downstream_gene_variant;intron_variant;non_coding_transcript_variant;upstream_gene_variant;intron_variant;NMD_transcript_variant;intron_variant |
| Known Loci | <i>PAX9</i>      | 14 | 37227795  | rs555814798 | Intronic | Transcript                                | protein_coding;retained_intron                                                                 | intron_variant;intron_variant;non_coding_transcript_variant                                                                                                               |
| Known Loci | <i>PAX9</i>      | 14 | 37458914  | rs10483482  | Intronic | Transcript                                | protein_coding;protein_coding_CDS_not_defined                                                  | intron_variant;intron_variant;non_coding_transcript_variant                                                                                                               |
| Known Loci | <i>PAX9</i>      | 14 | 37464217  | rs75088305  | Intronic | Transcript                                | protein_coding;protein_coding_CDS_not_defined                                                  | intron_variant;intron_variant;non_coding_transcript_variant                                                                                                               |
| Known Loci | <i>PAX9</i>      | 14 | 37514564  | rs10150336  | Intronic | Transcript                                | protein_coding;protein_coding_CDS_not_defined                                                  | intron_variant;intron_variant;non_coding_transcript_variant                                                                                                               |
| Known Loci | <i>LINC00640</i> | 14 | 51856064  | rs144433632 | Intronic | Transcript                                | lncRNA                                                                                         | downstream_gene_variant;intron_variant;non_coding_transcript_variant;upstream_gene_variant                                                                                |
| Known Loci | <i>GSC</i>       | 14 | 95378540  | rs61665130  | -        | -                                         | -                                                                                              | intergenic_variant                                                                                                                                                        |
| Known Loci | <i>UBL7-AS1</i>  | 15 | 74759689  | rs559701024 | Intronic | Transcript                                | lncRNA                                                                                         | downstream_gene_variant;intron_variant;non_coding_transcript_variant                                                                                                      |
| Known Loci | <i>CREBBP</i>    | 16 | 3963187   | rs9923088   | -        | -                                         | -                                                                                              | intergenic_variant                                                                                                                                                        |
| Known Loci | <i>NTN1</i>      | 17 | 8930279   | rs35023427  | Intronic | Transcript                                | protein_coding                                                                                 | intron_variant                                                                                                                                                            |

|            |                |    |          |             |                 |                                           |                                                                                       |                                                                                                                                                                                                                             |
|------------|----------------|----|----------|-------------|-----------------|-------------------------------------------|---------------------------------------------------------------------------------------|-----------------------------------------------------------------------------------------------------------------------------------------------------------------------------------------------------------------------------|
| Known Loci | <i>NTN1</i>    | 17 | 8943063  | rs9911652   | Intronic        | Transcript                                | protein_coding                                                                        | intron_variant                                                                                                                                                                                                              |
| Known Loci | <i>WNT9B</i>   | 17 | 44993128 | rs4968248   |                 | Transcript                                | lncRNA                                                                                | downstream_gene_variant;upstream_gene_variant                                                                                                                                                                               |
| Known Loci | <i>WNT9B</i>   | 17 | 45005703 | rs3785888   | Intronic        | Transcript                                | nonsense_mediated_decay;protein_coding;protein_coding_CDS_not_defined;retained_intron | intron_variant;NMD_transcript_variant;upstream_gene_variant;intron_variant;intron_variant;non_coding_transcript_variant                                                                                                     |
| Known Loci | <i>WNT9B</i>   | 17 | 45042079 | rs3760377   | Exonic;Intronic | MotifFeature;Transcript;RegulatoryFeature | nonsense_mediated_decay;protein_coding;protein_coding_CDS_not_defined;TF_binding_site | TF_binding_site_variant;3_prime_UTR_variant;NMD_transcript_variant;intron_variant;intron_variant;NMD_transcript_variant;intron_variant;downstream_gene_variant;non_coding_transcript_exon_variant;regulatory_region_variant |
| Known Loci | <i>NOG</i>     | 17 | 54776955 | rs227727    | -               | -                                         | -                                                                                     | intergenic_variant                                                                                                                                                                                                          |
| Known Loci | <i>RHPN2</i>   | 19 | 33515581 | rs145403118 | Intronic        | Transcript                                | nonsense_mediated_decay;protein_coding;retained_intron                                | intron_variant;NMD_transcript_variant;intron_variant;intron_variant;non_coding_transcript_variant                                                                                                                           |
| Known Loci | <i>RHPN2</i>   | 19 | 33517152 | rs28570619  | Intronic        | MotifFeature;RegulatoryFeature;Transcript | enhancer;nonsense_mediated_decay;protein_coding;retained_intron                       | TF_binding_site_variant;regulatory_region_variant;intron_variant;NMD_transcript_variant;intron_variant;intron_variant;non_coding_transcript_variant                                                                         |
| Known Loci | <i>RHPN2</i>   | 19 | 33525145 | rs10409307  | Intronic        | Transcript                                | nonsense_mediated_decay;protein_coding                                                | intron_variant;NMD_transcript_variant;intron_variant                                                                                                                                                                        |
| Known Loci | <i>RHPN2</i>   | 19 | 33545042 | rs12462348  | Intronic        | RegulatoryFeature;Transcript              | enhancer;nonsense_mediated_decay;processed_pseudogene;protein_coding                  | regulatory_region_variant;intron_variant;NMD_transcript_variant;downstream_gene_variant;intron_variant                                                                                                                      |
| Known Loci | <i>MAFB</i>    | 20 | 39265737 | rs6029242   | -               | -                                         | -                                                                                     | intergenic_variant                                                                                                                                                                                                          |
| Known Loci | <i>MAFB</i>    | 20 | 39270795 | rs6124259   |                 | RegulatoryFeature                         | enhancer                                                                              | regulatory_region_variant;intergenic_variant                                                                                                                                                                                |
| Known Loci | <i>MAFB</i>    | 20 | 39272739 | rs4812449   |                 | RegulatoryFeature                         | enhancer                                                                              | regulatory_region_variant;intergenic_variant                                                                                                                                                                                |
| Known Loci | <i>MAFB</i>    | 20 | 39274534 | rs71193616  | -               | -                                         | -                                                                                     | intergenic_variant                                                                                                                                                                                                          |
| Known Loci | <i>ERG</i>     | 21 | 40031924 | rs9647180   | Intronic        | Transcript                                | protein_coding;protein_coding_CDS_not_defined;retained_intron                         | intron_variant;intron_variant;non_coding_transcript_variant                                                                                                                                                                 |
| Known Loci | <i>ERG</i>     | 21 | 40034216 | rs59685837  |                 | Transcript                                | protein_coding;protein_coding_CDS_not_defined;retained_intron                         | upstream_gene_variant                                                                                                                                                                                                       |
| Known Loci | <i>ARVCF</i>   | 22 | 19972118 | rs9606203   | Intronic        | MotifFeature;RegulatoryFeature;Transcript | promoter;protein_coding;protein_coding_CDS_not_defined;retained_intron                | TF_binding_site_variant;regulatory_region_variant;intron_variant;intron_variant;non_coding_transcript_variant;upstream_gene_variant                                                                                         |
| Known Loci | <i>ARHGAP8</i> | 22 | 45150659 | rs5765956   | Intronic        | Transcript                                | nonsense_mediated_decay;protein_coding;retained_intron                                | intron_variant;NMD_transcript_variant;intron_variant;intron_variant;non_coding_transcript_variant                                                                                                                           |

Supplementary Table 6. Functional Annotation of the lead SNPs by Haploreg V4.2 and GTEx database

| Classification | Locus Name       | Chromosome | Position(b37) | rsid        | Ref  | Alt    | Promoter histone marks | Enhancer histone marks | DNase            | Motifs changed                                                                                                         | Enhancer_Encode | Promoter_En code            | eQTL_GTEX                                              | sQTL_GTEX                   |
|----------------|------------------|------------|---------------|-------------|------|--------|------------------------|------------------------|------------------|------------------------------------------------------------------------------------------------------------------------|-----------------|-----------------------------|--------------------------------------------------------|-----------------------------|
| Novel          | <i>NTRK1</i>     | 1          | 156839414     | rs4661229   | G    | A      |                        | 10 tissues             | PLCNT            |                                                                                                                        |                 |                             | MRPL24                                                 | <i>MRPL24;RRNAD1;SG20L2</i> |
| Novel          | <i>HMGCR</i>     | 2          | 219817037     | rs13011262  |      |        |                        |                        |                  |                                                                                                                        |                 |                             | GMPPA                                                  |                             |
| Novel          | <i>CALD1</i>     | 7          | 134845630     | rs4732060   | T    | C      |                        | 15 tissues             | 25 tissues       | Foxo_2,Nanog_disc2,Pou2f2_disc1,Pou2f2_known5,Pou3f3,Pou5f1_disc2,Sox_10,Sox_13,Sox_14,Sox_18,Sox_19,Sox_2,Sox_4,Sox_7 | NKEK;HepG2;HMEC | CALD1;RP11-134L10.1;C7orf49 | <i>TMEM140;CALD1</i>                                   |                             |
| Novel          | <i>CALD1</i>     | 7          | 134877068     | rs10488465  | T    | C      |                        |                        |                  | GATA,Pou2f2                                                                                                            |                 |                             | CALD1;RP11-134L10.1                                    | <i>CALD1</i>                |
| Novel          | <i>SHH</i>       | 7          | 156026696     | rs4716972   | G    | A      |                        | BRN                    |                  | BDP1,CTCF,MAZR,MZF1:-1-4,Myc,RXRA                                                                                      |                 |                             |                                                        |                             |
| Novel          | <i>NRG1</i>      | 8          | 32493817      | rs17645417  | T    | C      |                        | ESDR, ESC, BRN         | ESDR,G1          | HDAC2,NRSF                                                                                                             |                 |                             |                                                        |                             |
| Novel          | <i>PRICKLE1</i>  | 12         | 42488641      | rs12817499  | T    | C      |                        |                        |                  | Foxd3,Foxp1,HDAC2,Pou2f2,p300                                                                                          |                 |                             | PRICKLE1                                               |                             |
| Novel          | <i>ALX1</i>      | 12         | 85585770      | rs565838209 | G    | A      |                        |                        |                  |                                                                                                                        |                 |                             |                                                        |                             |
| Novel          | <i>SOX9</i>      | 17         | 72283506      | rs62069766  | G    | T      |                        | BRST, SKIN             | IPSC, BRST, BRST | BAF155,CTCF,Myc,YY1,Znf143                                                                                             |                 |                             |                                                        |                             |
| Novel          | <i>LINC00320</i> | 21         | 20793565      | rs13052576  | A    | G      |                        | FAT, BLD               | MUS,MUS,SKIN     | ESC                                                                                                                    |                 |                             |                                                        |                             |
| Novel          | <i>RUNX1</i>     | 21         | 34831549      | rs2246738   | G    | A      |                        | 5 tissues              | 6 tissues        | AP-1,SETDB1                                                                                                            |                 |                             |                                                        |                             |
| Novel          | <i>MYH9</i>      | 22         | 36288285      | rs5756130   | C    | T      |                        | 10 tissues             | ESDR,ESC         | Ets,NF-1,Pax-3,TCF12                                                                                                   |                 |                             |                                                        |                             |
| Known SNP      | <i>PAX7</i>      | 1          | 18972776      | rs9439713   | G    | A      |                        | 17 tissues             | 20 tissues       | BATF,CI2F,Foxa,Irf,NF-kappaB                                                                                           |                 |                             |                                                        |                             |
| Known SNP      | <i>ARHGAP29</i>  | 1          | 94558110      | rs66515264  | G    | T      | BLD, MUS               |                        |                  | CCN2,TNF-kappaB,PLAG1,RREB-1,RXRA,Spz1,ZNF219,Zfp281,Zfp740                                                            | HUVEC,NHLF      |                             | ARHGAP29                                               |                             |
| Known SNP      | <i>IRF6</i>      | 1          | 209989092     | rs72741048  | A    | T      | SKIN                   | 6 tissues              | 4 tissues        | Arid3a,Cdx,HMG-IY,MeI2,SIX5,TATA                                                                                       | HMEC,NHEK       |                             | IRF6,DIEXF                                             | <i>IRF6,C1orf74</i>         |
| Known SNP      | <i>IRF6</i>      | 1          | 209989270     | rs642961    | A    | G      | BRST, SKIN             | 11 tissues             | 5 tissues        |                                                                                                                        | HMEC,NHEK       |                             | IRF6,DIEXF,C1orf74                                     |                             |
| Known SNP      | <i>IRF6</i>      | 1          | 209923501     | rs1109430   | G    | A      |                        | 4 tissues              | ESDR,G1          |                                                                                                                        |                 |                             | TRAF3IP3,DIEXF                                         | <i>SERTAD4-AS1</i>          |
| Known SNP      | <i>IRF6</i>      | 1          | 210048819     | rs2064163   | G    | T      | BRN, BONE              | 13 tissues             | BRN,LNG          | Nanog,Pou5f1,Sox,TCF4                                                                                                  | HMEC,H5MM,NHEK  |                             | IRF6,C1orf74,SERTAD4-AS1                               |                             |
| Known SNP      | <i>FAM49A</i>    | 2          | 16711395      | rs6745357   | C    | G      |                        | KID                    |                  | Sox                                                                                                                    |                 |                             |                                                        |                             |
| Known SNP      | <i>ZFN4</i>      | 8          | 77496113      | rs11993273  | A    | G      |                        | STRM, SKIN             |                  | Foxa,Irf                                                                                                               |                 |                             | AC104623.2,RP11-542H15.1                               |                             |
| Known SNP      | <i>LINC00024</i> | 8          | 129964873     | rs17242358  | G    | A      |                        |                        |                  |                                                                                                                        |                 |                             |                                                        |                             |
| Known SNP      | <i>LINC00024</i> | 8          | 129976136     | rs55658222  | G    | A      |                        |                        |                  |                                                                                                                        |                 |                             |                                                        |                             |
| Known SNP      | <i>VAX1</i>      | 10         | 118846294     | rs10886040  | C    | G      |                        |                        | SKIN,CRVX,BRST   | Pou5f1,Sox                                                                                                             |                 |                             | RP11-53915.1,SHTN1                                     |                             |
| Known SNP      | <i>SPRY2</i>     | 13         | 80679302      | rs11841646  | T    | A      |                        |                        |                  | AP-1,Irf,PU.1,ZEB1                                                                                                     |                 |                             |                                                        |                             |
| Known SNP      | <i>LOC283553</i> | 14         | 51855553      | rs4901116   | G    | T      |                        | MUS                    | BLD,MUS          | Arid3a,Esx1,HMG-IY,Hoxa3,Hoxa5,Hoxa7,Hoxb3,Hoxb4,Hoxb6,Hoxc6,Nobox,Pax7,Pou2f2,Pou3f2,Pou4f3,Prrx1,Prrx2,Zfp187        |                 |                             | RP11-255G12.2                                          | <i>LINC00640</i>            |
| Known SNP      | <i>NTN1</i>      | 17         | 8947708       | rs12944377  | T    | C      |                        | LIV                    |                  | Pax-4,TCF12                                                                                                            |                 |                             | NTN1                                                   |                             |
| Known SNP      | <i>NOG</i>       | 17         | 54773238      | rs227731    | T    | G      |                        |                        |                  | Dobos4                                                                                                                 |                 |                             | NOG                                                    |                             |
| Known SNP      | <i>MAFB</i>      | 20         | 39281629      | rs6102085   | G    | A      |                        | ESDR, STRM, MUS        | KID              | Bcl6b,ELF1,Ets,Foxa,Myf,PU.1,SP1B,STAT,TATA,p300                                                                       |                 |                             |                                                        |                             |
| Known SNP      | <i>ARVCF</i>     | 22         | 19976845      | rs756653    | G    | A      |                        | 7 tissues              | BLD,BLD          | NRSF,Sin3Ak-20                                                                                                         |                 |                             | ARVCF,COMT,TANGO2                                      | <i>ARVCF,COMT</i>           |
| Known Loci     | <i>PAX7</i>      | 1          | 18957297      | rs569017380 | G    | A      |                        |                        |                  |                                                                                                                        |                 |                             |                                                        |                             |
| Known Loci     | <i>GRHL3</i>     | 1          | 24667423      | rs12568609  | G    | A      |                        | 9 tissues              | ESDR,ESDR,IPSC   | E2A,LBP-9,NRSF,ZEB1                                                                                                    |                 |                             | NIPAL3,RCAN3,STPG1                                     | <i>STPG1</i>                |
| Known Loci     | <i>FGGY</i>      | 1          | 59421811      | rs35110579  | A    | G      |                        | 10 tissues             | ESDR,HRT,MUS     |                                                                                                                        |                 |                             | HSD52                                                  |                             |
| Known Loci     | <i>FGGY</i>      | 1          | 59422001      | rs11577647  | T    | C      |                        | 8 tissues              | ESDR             |                                                                                                                        |                 |                             | HSD52                                                  |                             |
| Known Loci     | <i>ARHGAP29</i>  | 1          | 94601200      | rs13808826  | C    | CG     |                        |                        |                  | EWSR1-FLI1,NF-AT1                                                                                                      |                 |                             | RP11-148B18.1,ABCD3                                    |                             |
| Known Loci     | <i>ARHGAP29</i>  | 1          | 94606077      | rs7551877   | G    | A      |                        |                        |                  | HDAC2,RXRA,XBP-1                                                                                                       |                 |                             |                                                        |                             |
| Known Loci     | <i>ARHGAP29</i>  | 1          | 94615394      | rs11290844  | AT   | A      |                        | ESDR, ESC              |                  | HMG-IY,MeI2                                                                                                            |                 |                             | ABCD3,ARHGAP29                                         |                             |
| Known Loci     | <i>IRF6</i>      | 1          | 209894822     | rs201481822 | A    | AAG    |                        | 8 tissues              |                  | Ev1-1,FA,C1,Foxa,Foxd3,Foxp1,HDAC2,HMG-IY,Irf,NF-kappaB,Ox2,Pax-4,Zfp105,p300                                          |                 |                             |                                                        |                             |
| Known Loci     | <i>IRF6</i>      | 1          | 209913473     | rs12120361  | T    | G      |                        |                        |                  | CHOP::CEBPA                                                                                                            |                 |                             | TRAF3IP3,SYT14,IRF6,ADORA2B                            | <i>TRAF3IP3</i>             |
| Known Loci     | <i>IRF6</i>      | 1          | 209943893     | rs139818084 | GGTG | G      |                        | 9 tissues              | 15 tissues       | RREB-1,TEF-1                                                                                                           | HUVEC           |                             |                                                        |                             |
| Known Loci     | <i>IRF6</i>      | 1          | 209974232     | rs622832    | A    | C      | LIV, HRT               | 5 tissues              | BRST, BRST, SKIN | Zfx                                                                                                                    | HUVEC,HMEC      |                             | C1orf74,DIEXF,SYT14,TRAF3IP3                           |                             |
| Known Loci     | <i>IRF6</i>      | 1          | 209982738     | rs17015255  | A    | G      |                        | 4 tissues              | BRST,SKIN,BRST   | CDP,Sin3Ak-20                                                                                                          | HMEC,NHEK       |                             | SERTAD4-AS1                                            |                             |
| Known Loci     | <i>IRF6</i>      | 1          | 210043322     | rs3028171   | A    | 23-mer |                        | 9 tissues              | SKIN,MUS         |                                                                                                                        | HMEC,NHEK       |                             |                                                        |                             |
| Known Loci     | <i>IRF6</i>      | 1          | 210248548     | rs4844943   | C    | T      |                        | ESC, IPSC, BRN         | BRN              | ATF3,TALI                                                                                                              |                 |                             |                                                        | <i>SERTAD4-AS1</i>          |
| Known Loci     | <i>IRF6</i>      | 1          | 210253684     | rs10863809  | G    | T      |                        |                        |                  | Crx,GATA,Nrf1                                                                                                          |                 |                             |                                                        | <i>SERTAD4-AS1</i>          |
| Known Loci     | <i>IRF6</i>      | 1          | 210301331     | rs7516554   | C    | T      |                        |                        |                  | CHOP::CEBPA,E2F,YY1                                                                                                    |                 |                             | IRF6,TRAF3IP3                                          |                             |
| Known Loci     | <i>IRF6</i>      | 1          | 210352641     | rs2485896   | C    | G      |                        |                        |                  |                                                                                                                        |                 |                             | IRF6,DIEXF,SERTAD4-AS1,SYT14                           |                             |
| Known Loci     | <i>IRF6</i>      | 1          | 210355896     | rs12087757  | G    | A      |                        |                        |                  | Myc,Pax-5                                                                                                              |                 |                             | IRF6,LAMB3,SERTAD4-AS1                                 | <i>IRF6,C1orf74</i>         |
| Known Loci     | <i>IRF6</i>      | 1          | 210372114     | rs2494175   | A    | G,T    |                        | SKIN                   | SKIN             |                                                                                                                        |                 |                             |                                                        |                             |
| Known Loci     | <i>TAF1B</i>     | 2          | 9967620       | rs528634626 | G    |        |                        |                        |                  |                                                                                                                        |                 |                             |                                                        |                             |
| Known Loci     | <i>TAF1B</i>     | 2          | 10028440      | rs71389302  | A    | ATT    |                        |                        |                  | Foxp1,HDAC2,Zfp105                                                                                                     |                 |                             |                                                        |                             |
| Known Loci     | <i>FAM49A</i>    | 2          | 16705500      | rs140385594 | T    | TGTGA  |                        | ESDR, HRT, LNG         | ESDR             | FAC1,Foxp1,GR,Zfp105                                                                                                   |                 |                             |                                                        |                             |
| Known Loci     | <i>FAM49A</i>    | 2          | 16733525      | rs5007483   | G    | T      |                        |                        |                  | RFX5                                                                                                                   |                 |                             | AC104623.2,RP11-542H15.1                               |                             |
| Known Loci     | <i>HYAL2</i>     | 3          | 50281058      | rs11434969  | G    | GA     |                        |                        |                  | HDAC2,HMG-IY,PRDM1,Pax-4,Zfp105,p300                                                                                   |                 |                             | HYAL1,NA6,HYAL3,CYB561D2,ZMYND10,AMTRASSF1,CACNA2D2    | <i>HYALI,CISH</i>           |
| Known Loci     | <i>ADAMTS9</i>   | 3          | 64627602      | rs6445418   | G    | C,T    |                        | 9 tissues              | ESDR,VAS         |                                                                                                                        |                 |                             | ADAMTS9-AS1,ATXN7                                      | <i>ADAMTS9-AS1;ADAMTS9</i>  |
| Known Loci     | <i>ADAMTS9</i>   | 3          | 64630197      | rs9838262   | A    | G      |                        |                        |                  |                                                                                                                        |                 |                             | ADAMTS9-AS1                                            | <i>ADAMTS9-AS1;ADAMTS9</i>  |
| Known Loci     | <i>FILIP1L</i>   | 3          | 99680753      | rs11290599  | AG   | A      |                        | 9 tissues              |                  | Egr-1,GR                                                                                                               |                 |                             | CMSS1,COL8A1,FILIP1,ILN1,RP11-383Z3.2,TBC1D23,TMEM30CP |                             |
| Known Loci     | <i>TP63</i>      | 3          | 189544776     | rs75834417  | A    | C      |                        | 5 tissues              | SKIN             | Foxm1,STAT                                                                                                             | HMEC,NHEK       |                             |                                                        |                             |
| Known Loci     | <i>TP63</i>      | 3          | 189549082     | rs79792381  | C    | T      |                        | BRST, SKIN             |                  | CDP,Ev1-1,FXR,Fox,Foxc1,Foxd3,Foxl1,Foxj1,Foxj2,Foxk1,Foxp1,HDAC2,HNF1,Nkx6-2,PLZF,Sox                                 | NHEK            |                             |                                                        |                             |
| Known Loci     | <i>TP63</i>      | 3          | 189551340     | rs55660938  | C    | T      | SKIN                   | BRST, SKIN             | SKIN,SKIN        | CEBPB,NF-Y                                                                                                             | HMEC,NHEK       |                             |                                                        |                             |

|            |                  |    |           |             |      |        |            |                 |                                                                                                                       |                                                                                                                                                                                                                                                                    |                                        |                              |                                                                            |                                  |
|------------|------------------|----|-----------|-------------|------|--------|------------|-----------------|-----------------------------------------------------------------------------------------------------------------------|--------------------------------------------------------------------------------------------------------------------------------------------------------------------------------------------------------------------------------------------------------------------|----------------------------------------|------------------------------|----------------------------------------------------------------------------|----------------------------------|
| Known Loci | <i>NNT</i>       | 5  | 43856675  | rs34871596  | G    | A      |            | HRT, LNG        | Foxp1, RREB-1                                                                                                         |                                                                                                                                                                                                                                                                    |                                        |                              |                                                                            |                                  |
| Known Loci | <i>NNT</i>       | 5  | 43862510  | rs34378343  | T    | C      |            |                 | FAC1, Foxp1, GR, Zfp105                                                                                               |                                                                                                                                                                                                                                                                    | NNT, NNT-AS1, PAIP1, TMEM267           | NNT-AS1                      |                                                                            |                                  |
| Known Loci | <i>GMDS</i>      | 6  | 1944939   | rs11242726  | G    | A      |            |                 | BHLHE40, DMRT2, Pax-6, TCF4                                                                                           |                                                                                                                                                                                                                                                                    |                                        |                              |                                                                            |                                  |
| Known Loci | <i>GMDS</i>      | 6  | 1960651   | rs140236874 | G    | GA     |            | SKIN            | PLCNT                                                                                                                 | Cdx, FAC1, Foxa, Foxd3, Foxp1, HDAC2, Ik-2, NF-AT, Pax-4, Pou2f2, Pou3f2, STAT, TATA, TEF, Zfp105                                                                                                                                                                  | NHEK                                   |                              |                                                                            |                                  |
| Known Loci | <i>ZFXG4</i>     | 8  | 77498222  | rs144305105 | A    | ATTATT |            |                 | Cdx2, Dbx1, Evi-1, Fox, Foxa, HDAC2, Hlx1, Hoxa10, Hoxa9, Hoxb13, Hoxb9, Hoxd10, Lhx3, Ncx, PLZF, Pou3f4, Sox, Zfp105 |                                                                                                                                                                                                                                                                    |                                        |                              |                                                                            |                                  |
| Known Loci | <i>DCAF4L2</i>   | 8  | 88946414  | rs5893033   | G    | GA     |            |                 | Foxo, HDAC2, Ik-1, Me2, RBP-Jkappa, Sox                                                                               |                                                                                                                                                                                                                                                                    |                                        |                              |                                                                            |                                  |
| Known Loci | <i>RIPK2</i>     | 8  | 90232609  | rs141180188 | C    | CT     |            |                 | Foxm1, Pou3f2, Sox                                                                                                    |                                                                                                                                                                                                                                                                    |                                        |                              |                                                                            |                                  |
| Known Loci | <i>VIRMA</i>     | 8  | 95503542  | rs58089312  | C    | CA     |            |                 | Hoxa4, Zfp105                                                                                                         |                                                                                                                                                                                                                                                                    |                                        |                              |                                                                            |                                  |
| Known Loci | <i>VIRMA</i>     | 8  | 95663822  | rs10089502  | T    | C      |            |                 | Maf, Pou5f1, Sox                                                                                                      |                                                                                                                                                                                                                                                                    |                                        | ESRP1, DPY19L4, RP11-22C11.2 |                                                                            |                                  |
| Known Loci | <i>VIRMA</i>     | 8  | 95739642  | rs67763258  | G    | T      |            | ADRL, BLD       | HMG-1Y, Me2                                                                                                           |                                                                                                                                                                                                                                                                    | GM12878                                | DPY19L4, ESRP1               | DPY19L4                                                                    |                                  |
| Known Loci | <i>LINC00824</i> | 8  | 129699660 | rs7839784   | T    | C      |            | BLD             | AIRE, Foxa, SF1, p300                                                                                                 |                                                                                                                                                                                                                                                                    |                                        |                              |                                                                            |                                  |
| Known Loci | <i>LINC00824</i> | 8  | 129703990 | rs35379093  | T    | C      |            | ESC, IPSC       | Cdx, Foxp1, PLZF                                                                                                      |                                                                                                                                                                                                                                                                    |                                        |                              |                                                                            |                                  |
| Known Loci | <i>LINC00824</i> | 8  | 129911532 | rs10631848  | G    | 11-mer |            |                 | 4 tissues                                                                                                             |                                                                                                                                                                                                                                                                    |                                        |                              |                                                                            |                                  |
| Known Loci | <i>LINC00824</i> | 8  | 129950399 | rs1372450   | C    | T      |            | STRM, MUS       | MUS                                                                                                                   | GR, PTF1-beta                                                                                                                                                                                                                                                      | HSM1                                   |                              |                                                                            |                                  |
| Known Loci | <i>GADD45G</i>   | 9  | 92210595  | rs7024024   | A    | T      |            |                 |                                                                                                                       | PLZF, Sox                                                                                                                                                                                                                                                          | HSM1                                   |                              | UNQ6494                                                                    |                                  |
| Known Loci | <i>GADD45G</i>   | 9  | 92211862  | rs10429497  | G    | A      |            |                 |                                                                                                                       |                                                                                                                                                                                                                                                                    |                                        |                              | UNQ6494, GADD45G                                                           |                                  |
| Known Loci | <i>PTCH1</i>     | 9  | 98225056  | rs28377268  | G    | T      | 17 tissues |                 | ADRL                                                                                                                  | AP-1, Egr-1, GR, MAZ, MZF1:1-4, Pou2f2, SEF-1, SP1, STAT, Sp4, TATA, TFII-LZNF263, Zfp281, p300                                                                                                                                                                    | GM12878, K562, HUVEC, HSM1, NHLF, NHEK | PTCH1                        |                                                                            |                                  |
| Known Loci | <i>FOXE1</i>     | 9  | 100508754 | rs541315146 |      |        |            |                 |                                                                                                                       |                                                                                                                                                                                                                                                                    |                                        |                              |                                                                            |                                  |
| Known Loci | <i>FOXE1</i>     | 9  | 100619090 | rs35060625  | TCTC | T      |            |                 |                                                                                                                       | AP-3, CEBPG                                                                                                                                                                                                                                                        |                                        |                              | FOXE1, KRT18P13, NANS, PTCS2, RP11-24N9.4, TRMO, XPA                       | TRMO                             |
| Known Loci | <i>NR6A1</i>     | 9  | 127369279 | rs77346093  | T    | C      |            |                 |                                                                                                                       | Maf                                                                                                                                                                                                                                                                |                                        |                              |                                                                            |                                  |
| Known Loci | <i>VAX1</i>      | 10 | 118831210 | rs10886037  | A    | T      |            |                 |                                                                                                                       | Me2, p300                                                                                                                                                                                                                                                          |                                        |                              | RP11-53915.1, SHTN1                                                        |                                  |
| Known Loci | <i>VAX1</i>      | 10 | 118836682 | rs11197887  | T    | A      |            |                 |                                                                                                                       | HDAC2, Myc, Nanog, Ncx2                                                                                                                                                                                                                                            |                                        |                              | RP11-53915.1, SHTN1                                                        |                                  |
| Known Loci | <i>VAX1</i>      | 10 | 118850264 | rs17095834  | A    | G      |            |                 |                                                                                                                       | EWSR1-FLI1, Es, Foxo, Jrf, p300                                                                                                                                                                                                                                    |                                        |                              |                                                                            |                                  |
| Known Loci | <i>LGR5</i>      | 12 | 71967309  | rs67687642  | AT   | A      |            | BLD             |                                                                                                                       | Dbx1, HMG-1Y, Pou2f2                                                                                                                                                                                                                                               |                                        |                              | TMEM19                                                                     |                                  |
| Known Loci | <i>CLYBL</i>     | 13 | 100512107 | rs9557318   | G    | A      |            | 4 tissues       | BLD, BLD, BLD                                                                                                         | STAT                                                                                                                                                                                                                                                               |                                        |                              |                                                                            |                                  |
| Known Loci | <i>PAX9</i>      | 14 | 37227795  | rs55814798  | C    | T      |            |                 |                                                                                                                       |                                                                                                                                                                                                                                                                    |                                        |                              |                                                                            |                                  |
| Known Loci | <i>PAX9</i>      | 14 | 37458914  | rs10483482  | C    | T      |            |                 |                                                                                                                       |                                                                                                                                                                                                                                                                    |                                        |                              |                                                                            |                                  |
| Known Loci | <i>PAX9</i>      | 14 | 37464217  | rs75088305  | G    | A      |            | IPSC            | MUS                                                                                                                   | Es, Irf, STAT, TATA, YY1, p300                                                                                                                                                                                                                                     |                                        |                              |                                                                            |                                  |
| Known Loci | <i>PAX9</i>      | 14 | 37514564  | rs10150336  | A    | T      |            |                 |                                                                                                                       |                                                                                                                                                                                                                                                                    |                                        |                              | MIPOL1, RP11-35609.2, SLC25A21, SLC25A21-AS1, TMX1                         |                                  |
| Known Loci | <i>LINC00640</i> | 14 | 51856064  | rs144433632 | AAT  | A      |            |                 |                                                                                                                       | Pax-4                                                                                                                                                                                                                                                              |                                        |                              |                                                                            |                                  |
| Known Loci | <i>GSC</i>       | 14 | 95378540  | rs61665130  | T    | TG     |            |                 |                                                                                                                       | Barhl1, Barx1, Barx2, CHX10, Dbx1, Dlx2, Dlx3, Dlx5, Esr-1, Esr1, Evi-1, Foxa, Foxo, Foxp1, Gbx1, Gbx2, HDAC2, HNF1, Hoxa3, Hoxa9, Hoxb3, Hoxb4, Hoxd10, Lhx4, Lhx8, Me2, Mx-1, Mx2, Ncx, Ncx6-1, Ncx6-2, Pax-4, Pax-6, Pou2f2, Pou3f2, Pou3f4, Pou6f1, Prx1, Prx2 |                                        |                              | GSC                                                                        |                                  |
| Known Loci | <i>UBL7-AS1</i>  | 15 | 74759689  | rs559701024 |      |        |            |                 |                                                                                                                       |                                                                                                                                                                                                                                                                    |                                        |                              |                                                                            |                                  |
| Known Loci | <i>CREBBP</i>    | 16 | 3963187   | rs9923088   | C    | G      |            |                 |                                                                                                                       | PPAR, Pax-4                                                                                                                                                                                                                                                        |                                        |                              | RP11-462G12.1                                                              |                                  |
| Known Loci | <i>NTN1</i>      | 17 | 8930279   | rs35023427  | TA   | T      | GI         | 5 tissues       | 5 tissues                                                                                                             | ERalpha-a, TR4                                                                                                                                                                                                                                                     |                                        |                              | NTN1                                                                       |                                  |
| Known Loci | <i>NTN1</i>      | 17 | 8943063   | rs9911652   | C    | T      |            |                 |                                                                                                                       |                                                                                                                                                                                                                                                                    |                                        |                              | NTN1                                                                       |                                  |
| Known Loci | <i>WNT9B</i>     | 17 | 44993128  | rs4968248   | G    | A      |            | BRST, BRN, SKIN | PLCNT                                                                                                                 | AP-2                                                                                                                                                                                                                                                               |                                        |                              | GOSR2, KANSLLINC01974, LRR37A17P, MYL4, RP11-156P1.3, RPRML, WNT3          | GOSR2, RP11-156P1.3              |
| Known Loci | <i>WNT9B</i>     | 17 | 45005703  | rs3785888   | C    | T      | ESDR, GI   | 16 tissues      | GILLNG                                                                                                                |                                                                                                                                                                                                                                                                    | HUVEC                                  |                              | ARL17A, ARL17B, GOSR2                                                      | GOSR2, RP11-156P1.3, LRR46, WNT3 |
| Known Loci | <i>WNT9B</i>     | 17 | 45042079  | rs3760377   | G    | A      |            | ESDR            |                                                                                                                       | Maf, Mrg, NERF1a, Tgif1                                                                                                                                                                                                                                            |                                        |                              | ARL17A, ARL17B, GOSR2, KANSLLINC01974, LRR37A17P, P11-156P1.3, RPRML, WNT3 | GOSR2, RP11-156P1.3, WNT3        |
| Known Loci | <i>NOG</i>       | 17 | 54776955  | rs227272    | A    | T      | 11 tissues | 14 tissues      | 32 tissues                                                                                                            | Crx, Dmbx1, Obox3, Otx2, Pitx3, Spz1                                                                                                                                                                                                                               | HUVEC, HMEC, HSM1, NHEK, NHLF          |                              | NOG                                                                        |                                  |
| Known Loci | <i>RHPN2</i>     | 19 | 33515581  | rs145403118 | CT   | C      |            | 4 tissues       | ESDR, PLCNT                                                                                                           | LUN-1                                                                                                                                                                                                                                                              |                                        |                              | GPATCH1, LRP3, RHPN2                                                       | GPATCH1                          |
| Known Loci | <i>RHPN2</i>     | 19 | 33517152  | rs28570619  | G    | A      | LIV        | LIV, GI, LNG    |                                                                                                                       | Foxj2, Ik-2, Pitx2                                                                                                                                                                                                                                                 | HepG2                                  |                              | GPATCH1, RHPN2                                                             | GPATCH1                          |
| Known Loci | <i>RHPN2</i>     | 19 | 33525145  | rs10409307  | A    | G      |            |                 |                                                                                                                       | Myc, NRSF, PLAG1, Sp4, Zfx                                                                                                                                                                                                                                         |                                        |                              | RHPN2, PDCD5, NUDT19, GPATCH1, FAAP24, CTD-2538C1.2, CEP89, CEBPA-AS1      | GPATCH1                          |
| Known Loci | <i>RHPN2</i>     | 19 | 33545042  | rs12462348  | C    | T      |            | ESDR, GI, CRVX  | GLGI                                                                                                                  | Crx, Pitx2                                                                                                                                                                                                                                                         |                                        |                              | CTD-2538C1.2, GPATCH1, NUDT19, GPATCH1, PDCD5, RHPN2, WDR88                |                                  |
| Known Loci | <i>MAFB</i>      | 20 | 39265737  | rs6029242   | T    | C      |            | PANC            |                                                                                                                       |                                                                                                                                                                                                                                                                    |                                        |                              |                                                                            |                                  |
| Known Loci | <i>MAFB</i>      | 20 | 39270795  | rs6124259   | G    | A      |            | 5 tissues       | ESDR, LIV                                                                                                             | BDP1, Maf, NERF1a, Pbx3, Znf143                                                                                                                                                                                                                                    |                                        |                              |                                                                            |                                  |
| Known Loci | <i>MAFB</i>      | 20 | 39272739  | rs4812449   | C    | G      |            | 16 tissues      |                                                                                                                       | CEN2, GATA, SETDB1                                                                                                                                                                                                                                                 |                                        |                              |                                                                            |                                  |
| Known Loci | <i>MAFB</i>      | 20 | 39274534  | rs71193616  | G    | GGGA   |            | ADRL, VAS       |                                                                                                                       | ELF1, Egr-1, Es, GATA, Irf, MZF1:1-4, Pu, 1, Pax-5, SP1, TATA                                                                                                                                                                                                      |                                        |                              |                                                                            |                                  |
| Known Loci | <i>ERG</i>       | 21 | 40031924  | rs9647180   | T    | C      |            | 5 tissues       | LIV                                                                                                                   | Es, RXRA                                                                                                                                                                                                                                                           |                                        |                              | ERG                                                                        |                                  |
| Known Loci | <i>ERG</i>       | 21 | 40034216  | rs59685837  | GA   | G      |            | 4 tissues       | 8 tissues                                                                                                             | DMRT1, Irf, Zfp105                                                                                                                                                                                                                                                 |                                        |                              |                                                                            |                                  |
| Known Loci | <i>ARVCF</i>     | 22 | 19972118  | rs9606203   | C    | A      |            | 9 tissues       | 20 tissues                                                                                                            | 22 tissues                                                                                                                                                                                                                                                         |                                        | K562, HUVEC, HMEC, NHEK      | ARVCF, CCDC188, COMT, TA                                                   | ARVCF, COMT                      |
| Known Loci | <i>ARHGAP8</i>   | 22 | 45150659  | rs5765956   | C    | T      |            | IPSC, GI        | 13 tissues                                                                                                            | 7 tissues                                                                                                                                                                                                                                                          |                                        |                              | NGO2                                                                       | ARHGAP8                          |

Supplementary Table 7. Novel loci containing cleft genes

| Phenotype   | Locus Name       | Chromosome | Position(b37) | rsid        | GeneList (500kb flanked novel leadSN Related Genes/Region)                                                       | Syndromic (craniofacial phenoty Animal Model | orofacial cleft (PMID)                                         | Cranifacial pathway (PMID) |
|-------------|------------------|------------|---------------|-------------|------------------------------------------------------------------------------------------------------------------|----------------------------------------------|----------------------------------------------------------------|----------------------------|
| NSOC        | <i>NTRK1</i>     | 1          | 156809206     | rs4661229   | TSACC,RHBG,C1orf61,MIR9-1,MEF2D,IQGAP3,TTC24,APOA1BP,GPATCH4,HAPLN2,BCAN,NE S,CRABP2, ISG20L2,RRNAD1,MRPL24,HDGF | NTRK1                                        | cleft palate (PMID: 29421787)                                  |                            |
| NSCLP       | <i>HMGCR</i>     | 2          | 220681758     | rs13011262  | ENC1,HEXB,GFM2,NSA2,FAM169A,GCNT4,ANKRD31,HMGCR,C OL4A3BP,POLK,ANKDD1B                                           | HMGCR                                        | 36320166                                                       | 27488927                   |
| NSOC        | <i>CALD1</i>     | 7          | 134530381     | rs4732060   | <i>AKR1B1,AKR1B10,AKR1B15,BPGM,CALD1,AGBL3,TMEM140,C7orf49,WDR91,MIR6509,STR48,CNOT4</i>                         | 7q33 CNV                                     | cleft palate (PMID: 29260337)                                  |                            |
| NSCLP;NSCLP | <i>CALD1</i>     | 7          | 134561819     | rs10488465  | <i>AKR1B1,AKR1B10,AKR1B15,BPGM,CALD1,AGBL3,TMEM140,C7orf49,WDR91,MIR6509,STR48,CNOT4</i>                         | 7q33 CNV                                     | cleft palate (PMID: 29260337)                                  |                            |
| NSOC;NSCLP  | <i>SHH</i>       | 7          | 155819390     | rs4716972   | CNPY1,RBM33,SHH,LOC389602,LOC285889,LINC01006                                                                    | SHH                                          | 883,777,015,199,404                                            | 24590292                   |
| NSOC;NSCLP  | <i>NRG1</i>      | 8          | 32351333      | rs17645417  | NRG1,NRG1-IT1,NRG1-IT3                                                                                           |                                              |                                                                |                            |
| NSCLP       | <i>PRICKLE1</i>  | 12         | 42882443      | rs12817499  | GXYLT1,YAF2,ZCRB1,PPHLN1,P RICKLE1,LOC101927058                                                                  | <i>PRICKLE1</i>                              | 24689077                                                       | 2,468,907,735,809,770      |
| NSCLO       | <i>ALX1</i>      | 12         | 85979547      | rs565838209 | LRRIQ1,ALX1,RASSF9,MGAT4C                                                                                        | ALX1                                         | orofacial cleft (PMID: 35127681 35127681                       |                            |
| NSCLP       | <i>SOX9</i>      | 17         | 70279647      | rs62069766  | LOC102723505,LINC01152,LOC102723517,SOX9-AS1,LOC101928205,SOX9,LINC00673,LINC00511,SLC39A11                      | SOX9                                         | Pierre Robin sequence (PMID: 1 11371614                        |                            |
| NSOC;NSCLP  | <i>LINC00320</i> | 21         | 22165883      | rs13052576  | LINC00320,NCAM2,RNU6-67P                                                                                         |                                              |                                                                |                            |
| NSOC;NSCPO  | <i>RUNX1</i>     | 21         | 36203846      | rs2246738   | KCNE2,SMIM11,C21orf140,KCNE1,RCAN1,CLIC6,LINC00160,LOC100506385,RUNX1,RUNX1-IT1                                  | RUNX1                                        | 19000669, 30046048,14516670,31171577,34931: 19000669, 30046048 |                            |
| NSCLP       | <i>MYH9</i>      | 22         | 36684331      | rs5756130   | RBFOX2,APOL3,APOL4,APOL2,A POL1,MYH9,MIR6819,TXN2,FOX RED2,EIF3D,CACNG2,IFT27                                    | MYH9                                         | PMC2740885                                                     |                            |

Note: NSOC, non-syndromic orofacial cleft cases by combining NSCLP, NSCLO and NSCPO together; NSCLP, non-syndromic cleft lip with or without palate (NSCLP&NSCLO); NSCLP, non-syndromic cleft lip and palate; NSCLO, non-syndromic cleft lip only; NSCPO, non-syndromic cleft palate only.



Supplementary Table 8. Heritability Estimated based on LD score regression by phenotypic group across population

| Population | Phenotype | H2   | 95%CI      |
|------------|-----------|------|------------|
| Asian      | NSOC      | 0.12 | 0.087-0.15 |
| Asian      | NSCL/P    | 0.18 | 0.13-0.23  |
| Asian      | NSCLP     | 0.2  | 0.15-0.26  |
| Asian      | NSCLO     | 0.2  | 0.088-0.32 |
| Chinese    | NSOC      | 0.14 | 0.11-0.18  |
| Chinese    | NSCL/P    | 0.21 | 0.16-0.27  |
| Chinese    | NSCLP     | 0.19 | 0.14-0.25  |
| Chinese    | NSCLO     | 0.25 | 0.12-0.38  |
| Chinese    | NSCPO     | 0.26 | 0.19-0.33  |

Note: NSOC, non-syndromic orofacial cleft cases by combining NSCLP, NSCLO and NSCPO together; NSCL/P, non-syndromic cleft lip with or without palate (NSCLP&NSCLO); NSCLP, non-syndromic cleft lip and palate; NSCLO, non-syndromic cleft lip only; NSCPO, non-syndromic cleft palate only; 95%CI, 95% confidence interval.

Supplementary Table 9. Genetic Correlation Analysis in Chinese and European Population

| Population | Phenotype_1 | Phenotype_2  | p-value  | rg     | 95%Lower rg | 95%Upper rg | se rg | z     | h2_obs | h2_obs_se | h2_int | h2_int_se | gcov_int | gcov_int_se |
|------------|-------------|--------------|----------|--------|-------------|-------------|-------|-------|--------|-----------|--------|-----------|----------|-------------|
| Chinese    | NSCLO       | NSCPO        | 0.38     | 0.2    | -0.25       | 0.65        | 0.23  | 0.87  | 0.16   | 0.039     | 1.12   | 0.0094    | 0.27     | 0.0065      |
|            | NSCLO       | NSCLP        | 1.92E-09 | 0.71   | 0.48        | 0.94        | 0.12  | 6     | 0.3    | 0.059     | 1.06   | 0.0094    | 0.12     | 0.0072      |
|            | NSCPO       | NSCLP        | 0.65     | -0.05  | -0.26       | 0.17        | 0.11  | -0.45 | 0.32   | 0.052     | 1.05   | 0.0079    | 0.14     | 0.0055      |
| European   | NSOC        | BMI          | 0.03     | 0.079  | 0.0076      | 0.15        | 0.04  | 2.17  | 0.21   | 0.007     | 1.03   | 0.033     | -0.013   | 0.0079      |
|            | NSCLP       | BMI          | 0.033    | 0.077  | 0.0063      | 0.15        | 0.04  | 2.14  | 0.21   | 0.007     | 1.03   | 0.033     | -0.015   | 0.0081      |
|            | NSCLP       | BMI          | 0.04     | 0.072  | 0.0032      | 0.14        | 0.04  | 2.05  | 0.21   | 0.007     | 1.03   | 0.033     | -0.015   | 0.0081      |
|            | NSCPO       | BMI          | 0.52     | -0.037 | -0.15       | 0.08        | 0.06  | -0.64 | 0.21   | 0.0072    | 1.03   | 0.034     | -0.0092  | 0.0083      |
|            | NSOC        | Fetal_BW     | 0.79     | 0.014  | -0.087      | 0.11        | 0.05  | 0.26  | 0.098  | 0.0057    | 1.09   | 0.018     | -0.0033  | 0.0061      |
|            | NSCLP       | Fetal_BW     | 0.53     | 0.033  | -0.069      | 0.13        | 0.05  | 0.63  | 0.098  | 0.0057    | 1.09   | 0.018     | -0.0063  | 0.006       |
|            | NSCLP       | Fetal_BW     | 0.49     | 0.036  | -0.065      | 0.14        | 0.05  | 0.7   | 0.098  | 0.0057    | 1.09   | 0.018     | -0.0042  | 0.0061      |
|            | NSCPO       | Fetal_BW     | 0.44     | 0.064  | -0.099      | 0.23        | 0.08  | 0.77  | 0.096  | 0.0059    | 1.1    | 0.02      | -0.0019  | 0.0056      |
|            | NSOC        | Fetal_Effect | 0.33     | 0.076  | -0.077      | 0.23        | 0.08  | 0.98  | 0.03   | 0.003     | 1.04   | 0.01      | -0.0027  | 0.0054      |
|            | NSCLP       | Fetal_Effect | 0.41     | 0.066  | -0.09       | 0.22        | 0.08  | 0.83  | 0.03   | 0.003     | 1.04   | 0.01      | -0.0056  | 0.0053      |
|            | NSCLP       | Fetal_Effect | 0.36     | 0.072  | -0.081      | 0.22        | 0.08  | 0.92  | 0.03   | 0.003     | 1.04   | 0.0099    | -0.0031  | 0.0053      |
|            | NSCPO       | Fetal_Effect | 0.38     | 0.11   | -0.13       | 0.35        | 0.12  | 0.89  | 0.029  | 0.003     | 1.05   | 0.01      | -0.0023  | 0.0047      |

Note: NSOC, non-syndromic orofacial cleft cases by combining NSCLP, NSCLO and NSCPO together; NSCL/P, non-syndromic cleft lip with or without palate (NSCLP&NSCLO); NSCLP, non-syndromic cleft lip and palate; NSCLO, non-syndromic cleft lip only; NSCPO, non-syndromic cleft palate only; Fetal\_BW, Fetal birth weight.

Supplementary Table 10. Associations of Lead SNPs with Other Traits

| Group            | SNP                   | Lead Name  | Chromosome | Position(kb) | A1        | A2                       | Trait                                                                                                                                                                                                                                                                                                                                                                                                                                                                           | EFO                                                                                  | PMB                        | Ancestry                  | P lowest   | Beta       | SE       | N                     | Dataset                                                                                                                                   |                                  |
|------------------|-----------------------|------------|------------|--------------|-----------|--------------------------|---------------------------------------------------------------------------------------------------------------------------------------------------------------------------------------------------------------------------------------------------------------------------------------------------------------------------------------------------------------------------------------------------------------------------------------------------------------------------------|--------------------------------------------------------------------------------------|----------------------------|---------------------------|------------|------------|----------|-----------------------|-------------------------------------------------------------------------------------------------------------------------------------------|----------------------------------|
| Orofacial clefts | rs4939713             | FLAT1      | 1          | 18972776     | A         | G                        | Cleft lip with or without cleft palate;Orofacial clefts                                                                                                                                                                                                                                                                                                                                                                                                                         | HP_000175;EFO_0003959;HP_000202                                                      | 28054174                   | Mixed                     | 6E-13      | NA         | NA       | -                     | NHGRI;EBI;GWAS_Catalog                                                                                                                    |                                  |
|                  | rs6515264             | BRIGLIP29  | 1          | 9455110      | G         | T                        | Cleft lip with or without cleft palate;Orofacial clefts                                                                                                                                                                                                                                                                                                                                                                                                                         | HP_000175;EFO_0003959;HP_000202                                                      | 28054174                   | Mixed                     | 4E-17      | NA         | NA       | -                     | NHGRI;EBI;GWAS_Catalog                                                                                                                    |                                  |
|                  | rs1109430             | BRF6       | 1          | 20995291     | A         | G                        | Orofacial clefts                                                                                                                                                                                                                                                                                                                                                                                                                                                                | HP_000202                                                                            | 28054174                   | Mixed                     | 1E-21      | NA         | NA       | -                     | NHGRI;EBI;GWAS_Catalog                                                                                                                    |                                  |
|                  | rs2064163             | BRF6       | 1          | 210648819    | G         | T                        | Non-syndromic cleft lip with cleft palate;Cleft lip with or without cleft palate in Asian ancestry population                                                                                                                                                                                                                                                                                                                                                                   | HP_000175;EFO_0003959                                                                | 28222668                   | East Asian                | 9E-19      | 0.264      | 0.02954  | -                     | NHGRI;EBI;GWAS_Catalog;GRASP                                                                                                              |                                  |
|                  | rs1724238             | LINC00824  | 8          | 129964873    | A         | G                        | Orofacial clefts                                                                                                                                                                                                                                                                                                                                                                                                                                                                | HP_000202                                                                            | 28054174                   | Mixed                     | 6E-37      | NA         | NA       | -                     | NHGRI;EBI;GWAS_Catalog                                                                                                                    |                                  |
|                  | rs5568222             | LINC00824  | 8          | 129976136    | A         | G                        | Cleft lip with or without cleft palate                                                                                                                                                                                                                                                                                                                                                                                                                                          | HP_000175;EFO_0003959                                                                | 28054174                   | Mixed                     | 8E-44      | NA         | NA       | -                     | NHGRI;EBI;GWAS_Catalog                                                                                                                    |                                  |
|                  | rs1088608             | FLU1       | 10         | 118166284    | C         | G                        | Orofacial clefts;Cleft lip with or without cleft palate                                                                                                                                                                                                                                                                                                                                                                                                                         | HP_000202;HP_000175;EFO_0003959                                                      | 28054174                   | Mixed                     | 3E-11      | NA         | NA       | -                     | NHGRI;EBI;GWAS_Catalog                                                                                                                    |                                  |
|                  | rs1184166             | SPR12      | 13         | 80679302     | A         | T                        | Non-syndromic cleft lip;Cleft lip with or without cleft palate;Orofacial clefts                                                                                                                                                                                                                                                                                                                                                                                                 | EFO_0003959;HP_000175;HP_000202                                                      | 22863734                   | Mixed                     | 4.71E-11   | NA         | NA       | 2383                  | GRASP;NHGRI;EBI;GWAS_Catalog                                                                                                              |                                  |
|                  | rs9911652             | NTN1       | 17         | 8943063      | C         | T                        | Cleft lip with or without cleft palate                                                                                                                                                                                                                                                                                                                                                                                                                                          | HP_000175;EFO_0003959                                                                | 28054174                   | Mixed                     | 0.00000003 | NA         | NA       | -                     | NHGRI;EBI;GWAS_Catalog                                                                                                                    |                                  |
|                  | rs1294377             | NTN1       | 17         | 8947708      | C         | T                        | Cleft lip with or without cleft palate;Orofacial clefts                                                                                                                                                                                                                                                                                                                                                                                                                         | HP_000175;EFO_0003959;HP_000202                                                      | 28054174                   | Mixed                     | 8E-21      | NA         | NA       | -                     | NHGRI;EBI;GWAS_Catalog                                                                                                                    |                                  |
|                  | rs227731              | NOG        | 17         | 54773238     | T         | G                        | Cleft lip with or without cleft palate;Non-syndromic cleft lip with cleft palate;Cleft lip;Orofacial clefts;Non-syndromic cleft lip with cleft palate                                                                                                                                                                                                                                                                                                                           | HP_000175;EFO_0003959;EFO_0004625                                                    | 28054174;28212668          | Mixed;East Asian;European | 0.00000002 | NA         | NA       | -                     | NHGRI;EBI;GWAS_Catalog;dbGaP;GRASP                                                                                                        |                                  |
|                  | rs1020285             | MLF9       | 20         | 9921629      | A         | G                        | Cleft lip with or without cleft palate in Asian ancestry population;Cleft lip with or without cleft palate                                                                                                                                                                                                                                                                                                                                                                      | EFO_0003959                                                                          | 20434609                   | Mixed                     | 1.22E-08   | NA         | NA       | -                     | GIANT                                                                                                                                     |                                  |
|                  | rs1092971             | BRF6       | 1          | 21063132     | A         | C                        | Leg fat mass;Left leg fat mass;Right arm fat mass;Right arm fat mass left                                                                                                                                                                                                                                                                                                                                                                                                       | -                                                                                    | UKBB                       | European                  | 2.92E-09   | -0.0142    | 0.00283  | 33125                 | Neale-H_UKBB_EUR_2017                                                                                                                     |                                  |
|                  | rs1754554             | BRF6       | 1          | 21030131     | C         | T                        | Hip circumference;Arm fat percentage;Right body mass index;Arm fat mass left;Arm fat mass right;Arm fat mass left;Arm fat mass right                                                                                                                                                                                                                                                                                                                                            | EFO_0005993;EFO_0004430                                                              | UKBB                       | European                  | 2.52E-10   | -0.0154    | 0.00247  | 336601                | Neale-H_UKBB_EUR_2017                                                                                                                     |                                  |
|                  | rs248396              | BRF6       | 1          | 21052641     | C         | G                        | Leg fat mass;Left leg fat mass;Right arm fat mass;Right arm fat mass left;Arm fat mass right;Trunk fat mass;Whole body fat mass;Arm fat percentage;Left hip circumference;Arm fat percentage;Right hip circumference;Weight;Trunk fat percentage;Leg fat percentage;Left leg fat percentage;Right leg fat percentage                                                                                                                                                            | EFO_0004342                                                                          | UKBB                       | European                  | 4.57E-12   | -0.01704   | 0.002463 | 331275                | Neale-H_UKBB_EUR_2017                                                                                                                     |                                  |
|                  | Anthropometric traits | rs10488465 | CALDI      | 7            | 134561819 | C                        | T                                                                                                                                                                                                                                                                                                                                                                                                                                                                               | Impedance of arm left                                                                | -                          | UKBB                      | European   | 1.605E-08  | 0.01057  | 0.001871              | 331292                                                                                                                                    | Neale-H_UKBB_EUR_2017            |
|                  |                       | rs6776258  | IIBM1      | 8            | 95739642  | G                        | T                                                                                                                                                                                                                                                                                                                                                                                                                                                                               | Body mass index;Leg fat mass;Right leg fat mass left                                 | EFO_0004340                | UKBB                      | European   | 7.104E-09  | -0.0147  | 0.00254               | 336107                                                                                                                                    | Neale-H_UKBB_EUR_2017            |
|                  |                       | rs1372456  | LINC00824  | 8            | 12969309  | C                        | T                                                                                                                                                                                                                                                                                                                                                                                                                                                                               | Height                                                                               | EFO_0004339                | 25282103                  | European   | 0.00000003 | -0.017   | 0.003                 | 252109                                                                                                                                    | GIANT_Height_EUR_2014            |
| rs2837728        |                       | PICHI      | 9          | 98228566     | G         | T                        | Sitting height;Height;Trunk fat-free mass;Trunk predicted mass;Whole body fat-free mass;Whole body water mass;Leg fat-free mass;Right leg predicted mass;Right basal metabolic rate;Leg predicted mass left;Leg fat-free mass left;Arm predicted mass;Right arm predicted mass left;Arm fat-free mass right;Arm fat-free mass left;Birth weight;Impedance of leg right;Impedance of leg left;Comparative height size at age 10;Hip circumference;Impedance of whole body;Weight | EFO_0004339;EFO_0007777;EFO_0004344;EFO_0004340                                      | UKBB                       | European                  | 1.824E-53  | -0.04668   | 0.003032 | 336172                | Neale-H_UKBB_EUR_2017                                                                                                                     |                                  |
| rs4968248        |                       | BNY5B      | 17         | 44991328     | A         | G                        | Sitting height                                                                                                                                                                                                                                                                                                                                                                                                                                                                  | EFO_0004339                                                                          | UKBB                       | European                  | 7.174E-09  | 0.01114    | 0.001924 | 336172                | Neale-H_UKBB_EUR_2017                                                                                                                     |                                  |
| rs1760377        |                       | BNY5B      | 17         | 45042079     | A         | G                        | Sitting height                                                                                                                                                                                                                                                                                                                                                                                                                                                                  | EFO_0004339                                                                          | UKBB                       | European                  | 1.303E-08  | 0.0107     | 0.001882 | 336172                | Neale-H_UKBB_EUR_2017                                                                                                                     |                                  |
| rs227731         |                       | NOG        | 17         | 54773238     | T         | G                        | Height;Comparative height size at age 10                                                                                                                                                                                                                                                                                                                                                                                                                                        | EFO_0004339                                                                          | 25282103;UKBB;28146470;231 | European;Mixed            | 3.1E-18    | -0.026     | 0.003    | 252377                | GIANT_Height_EUR_2014;Neale-H_UKBB_EUR_2017;GIANT_Height_Mixed_EUR_2013;GIANT_Height_EUR_2014;Neale-H_UKBB_EUR_2017;GIANT_Height_EUR_2013 |                                  |
| rs227727         |                       | NOG        | 17         | 54776955     | T         | A                        | Height;Comparative height size at age 10                                                                                                                                                                                                                                                                                                                                                                                                                                        | EFO_0004339                                                                          | 25282103;UKBB;23754948     | European                  | 3.7E-18    | 0.027      | 0.003    | 252147                | GIANT_Height_EUR_2014;Neale-H_UKBB_EUR_2017;GIANT_Height_EUR_2013                                                                         |                                  |
| Blood cell       |                       | rs12120361 | BRF6       | 1            | 209913473 | G                        | T                                                                                                                                                                                                                                                                                                                                                                                                                                                                               | Red blood cell count                                                                 | EFO_0004386                | 27862322                  | European   | 3.617E-09  | 0.02579  | 0.004371              | 173480                                                                                                                                    | Asie-W_Blood-Cell-Trait_EUR_2016 |
|                  |                       | rs14035594 | FAM69A     | 2            | 16705580  | -                        | G/T/A                                                                                                                                                                                                                                                                                                                                                                                                                                                                           | Mean platelet volume                                                                 | EFO_0004386                | 27862322                  | European   | 5.34E-19   | NA       | NA                    | 173480                                                                                                                                    | Asie-W_Blood-Cell-Trait_EUR_2016 |
|                  |                       | rs645357   | FAM69A     | 2            | 16713395  | C                        | G                                                                                                                                                                                                                                                                                                                                                                                                                                                                               | Mean platelet volume                                                                 | EFO_0004386                | 27862322                  | European   | 1.561E-13  | -0.02941 | 0.003983              | 173480                                                                                                                                    | Asie-W_Blood-Cell-Trait_EUR_2016 |
|                  |                       | rs5007483  | FAM69A     | 2            | 16733525  | G                        | T                                                                                                                                                                                                                                                                                                                                                                                                                                                                               | Mean platelet volume                                                                 | EFO_0004386                | 27862322                  | European   | 1.741E-13  | -0.02983 | 0.004049              | 173480                                                                                                                                    | Asie-W_Blood-Cell-Trait_EUR_2016 |
|                  |                       | rs2837728  | PICHI      | 9            | 98228566  | G                        | T                                                                                                                                                                                                                                                                                                                                                                                                                                                                               | Neutrophil count                                                                     | EFO_0007660                | UKBB                      | European   | 7.101E-08  | -0.00667 | 0.01406               | 274108                                                                                                                                    | Neale-H_UKBB_EUR_2017            |
|                  |                       | rs602942   | MAFB       | 20           | 39265737  | C                        | T                                                                                                                                                                                                                                                                                                                                                                                                                                                                               | White blood cell count                                                               | EFO_0004386                | 27862322                  | European   | 1.784E-09  | 0.02238  | 0.00372               | 173480                                                                                                                                    | Asie-W_Blood-Cell-Trait_EUR_2016 |
|                  |                       | rs6124259  | MAFB       | 20           | 39270795  | A                        | G                                                                                                                                                                                                                                                                                                                                                                                                                                                                               | White blood cell count;Monocyte count                                                | EFO_0004386                | 27862322                  | European   | 4.565E-11  | 0.02451  | 0.00722               | 173480                                                                                                                                    | Asie-W_Blood-Cell-Trait_EUR_2016 |
|                  |                       | rs812449   | MAFB       | 20           | 39272739  | C                        | G                                                                                                                                                                                                                                                                                                                                                                                                                                                                               | Monocyte count;White blood cell count                                                | EFO_0004386                | 27862322                  | European   | 2.297E-10  | 0.02312  | 0.00366               | 173480                                                                                                                                    | Asie-W_Blood-Cell-Trait_EUR_2016 |
|                  |                       | rs9606203  | ARFCF      | 22           | 19972118  | A                        | C                                                                                                                                                                                                                                                                                                                                                                                                                                                                               | Platelet;CD11b;Platelet count;White blood cell count;Lymphocyte count;Monocyte count | EFO_0004386                | 27862322                  | European   | 1.819E-11  | 0.02715  | 0.00404               | 173480                                                                                                                                    | Asie-W_Blood-Cell-Trait_EUR_2016 |
|                  |                       | rs756653   | ARFCF      | 22           | 19976843  | G                        | A                                                                                                                                                                                                                                                                                                                                                                                                                                                                               | Platelet;CD11b;Platelet count;White blood cell count;Lymphocyte count;Monocyte count | EFO_0004386                | 27862322                  | European   | 1.638E-11  | -0.02722 | 0.00402               | 173480                                                                                                                                    | Asie-W_Blood-Cell-Trait_EUR_2016 |
|                  | rs4968248             | BNY5B      | 17         | 44991328     | A         | G                        | Systolic blood pressure                                                                                                                                                                                                                                                                                                                                                                                                                                                         | EFO_0006335                                                                          | UKBB                       | European                  | 1.269E-15  | -0.02016   | 0.002521 | 317754                | Neale-H_UKBB_EUR_2017                                                                                                                     |                                  |
|                  | rs1760377             | BNY5B      | 17         | 45042079     | A         | G                        | Systolic blood pressure                                                                                                                                                                                                                                                                                                                                                                                                                                                         | EFO_0006335                                                                          | UKBB                       | European                  | 4.795E-09  | -0.01444   | 0.002466 | 317754                | Neale-H_UKBB_EUR_2017                                                                                                                     |                                  |
| rs9647180        | ERG                   | 21         | 40011924   | C            | T         | Diastolic blood pressure | EFO_0006336                                                                                                                                                                                                                                                                                                                                                                                                                                                                     | UKBB                                                                                 | European                   | 1.986E-08                 | 0.01852    | 0.00291    | 317756   | Neale-H_UKBB_EUR_2017 |                                                                                                                                           |                                  |
| Bone             | rs2837728             | PICHI      | 9          | 98228566     | G         | T                        | Bone mineral density spine                                                                                                                                                                                                                                                                                                                                                                                                                                                      | EFO_0007701                                                                          | 26733130                   | Mixed                     | 1E-11      | -0.088     | 0.01293  | -                     | NHGRI;EBI;GWAS_Catalog                                                                                                                    |                                  |
|                  | rs2879619             | RIP1P2     | 19         | 33517352     | A         | G                        | Heel bone mineral density;Heel bone mineral density right;Heel bone mineral density left                                                                                                                                                                                                                                                                                                                                                                                        | EFO_0009270                                                                          | UKBB                       | European                  | 1.15E-42   | 0.1053     | 0.00769  | 194398                | Neale-H_UKBB_EUR_2017                                                                                                                     |                                  |
|                  | rs947139              | ERG        | 21         | 40011924     | C         | T                        | Heel bone mineral density                                                                                                                                                                                                                                                                                                                                                                                                                                                       | EFO_0009270                                                                          | UKBB                       | European                  | 6.462E-20  | 0.03366    | 0.003684 | 194398                | Neale-H_UKBB_EUR_2017                                                                                                                     |                                  |
| Others           | rs1256869             | GRHL3      | 1          | 24667423     | A         | G                        | Hair or balding pattern; pattern 4                                                                                                                                                                                                                                                                                                                                                                                                                                              | EFO_0007822                                                                          | UKBB                       | European                  | 4.01E-08   | -0.00899   | 0.001637 | 154988                | Neale-H_UKBB_EUR_2017                                                                                                                     |                                  |
|                  | rs2837728             | PICHI      | 9          | 98228566     | G         | T                        | Forced vital capacity;Forced vital capacity, best measure;Forced expiratory volume in 1-second                                                                                                                                                                                                                                                                                                                                                                                  | EFO_0004122;EFO_0004414                                                              | UKBB                       | European                  | 2.14E-27   | -0.03455   | 0.003186 | 307638                | Neale-H_UKBB_EUR_2017                                                                                                                     |                                  |
|                  | rs2837728             | PICHI      | 9          | 98228566     | G         | T                        | Sensativity or hot feelings                                                                                                                                                                                                                                                                                                                                                                                                                                                     | EFO_0009599                                                                          | UKBB                       | European                  | 3.544E-11  | -0.01288   | 0.001946 | 278312                | Neale-H_UKBB_EUR_2017                                                                                                                     |                                  |
|                  | rs2837728             | PICHI      | 9          | 98228566     | G         | T                        | Worrier or anxious feelings                                                                                                                                                                                                                                                                                                                                                                                                                                                     | EFO_0009963                                                                          | UKBB                       | European                  | 4.745E-08  | -0.01064   | 0.001948 | 328717                | Neale-H_UKBB_EUR_2017                                                                                                                     |                                  |
|                  | rs1760377             | BNY5B      | 17         | 45042079     | A         | G                        | Gene expression of CDR1B2 in prefrontal cortex                                                                                                                                                                                                                                                                                                                                                                                                                                  | GO_0011148                                                                           | 21989113                   | European                  | 1E-52      | NA         | NA       | 60983                 | GIANT                                                                                                                                     |                                  |

Supplementary Table 11. Two Sample Mendelian randomization Analysis Between Maternal BMI and offspring orofacial clefts

| Phenotype     | Method                    | No.SNP    | Beta        | Std.Error   | p-value      | OR(95%CI)               |
|---------------|---------------------------|-----------|-------------|-------------|--------------|-------------------------|
| NSOC          | MR Egger                  | 57        | 1.39        | 2.11        | 0.51         | 4.01(0.06-252.57)       |
| <b>NSOC</b>   | <b>Weighted median</b>    | <b>57</b> | <b>1.83</b> | <b>1.08</b> | <b>0.089</b> | <b>6.24(0.76-51.32)</b> |
| NSOC          | Inverse variance weighted | 57        | 0.46        | 0.74        | 0.53         | 1.59(0.37-6.74)         |
| NSOC          | Simple mode               | 57        | 2.25        | 2.28        | 0.33         | 9.48(0.11-821.81)       |
| NSOC          | Weighted mode             | 57        | 1.98        | 1.77        | 0.27         | 7.21(0.22-232.79)       |
| NSCL/P        | MR Egger                  | 57        | 2.48        | 2.36        | 0.3          | 11.93(0.12-1218.31)     |
| <b>NSCL/P</b> | <b>Weighted median</b>    | <b>57</b> | <b>2.06</b> | <b>1.17</b> | <b>0.079</b> | <b>7.87(0.79-78.7)</b>  |
| NSCL/P        | Inverse variance weighted | 57        | 0.56        | 0.82        | 0.49         | 1.76(0.35-8.79)         |
| NSCL/P        | Simple mode               | 57        | 1.95        | 2.39        | 0.42         | 7.02(0.06-758.91)       |
| NSCL/P        | Weighted mode             | 57        | 2.11        | 1.96        | 0.29         | 8.24(0.18-382.6)        |
| NSCLP         | MR Egger                  | 57        | 3.35        | 2.5         | 0.19         | 28.41(0.21-3823.31)     |
| NSCLP         | Weighted median           | 57        | 1.4         | 1.28        | 0.27         | 4.04(0.33-49.25)        |
| NSCLP         | Inverse variance weighted | 57        | 0.52        | 0.87        | 0.55         | 1.68(0.3-9.23)          |
| NSCLP         | Simple mode               | 57        | -0.68       | 2.57        | 0.79         | 0.51(0-78.03)           |
| NSCLP         | Weighted mode             | 57        | 1.84        | 2.05        | 0.37         | 6.31(0.11-353.17)       |
| NSCLO         | MR Egger                  | 54        | 2.21        | 3.43        | 0.52         | 9.13(0.01-7629.86)      |
| NSCLO         | Weighted median           | 54        | -0.1        | 1.75        | 0.96         | 0.91(0.03-27.87)        |
| NSCLO         | Inverse variance weighted | 54        | 0.17        | 1.18        | 0.89         | 1.18(0.12-11.93)        |
| NSCLO         | Simple mode               | 54        | -0.52       | 3.45        | 0.88         | 0.59(0-513.91)          |
| NSCLO         | Weighted mode             | 54        | -0.07       | 2.62        | 0.98         | 0.93(0.01-159.77)       |

Note: NSOC, non-syndromic orofacial cleft cases by combining NSCLP,NSCLO and NSCPO together; NSCL/P, non-syndromic cleft lip with or without palate (NSCLP&NSCLO); NSCLP, non-syndromic cleft lip and palate; NSCLO, non-syndromic cleft lip only;OR, Odds ratio; 95%CI, 95% confidence interval.

Supplementary Table 12. Association Results of Training Dataset

| POFC1(Weight) | CHW_Axiom (Training) | Estimate | Std.Error | z_value | p-value |
|---------------|----------------------|----------|-----------|---------|---------|
| NSOC          | NSOC                 | 0.18     | 0.071     | 2.5     | 0.012   |
| NSOC          | NSCL/P               | 0.18     | 0.071     | 2.45    | 0.014   |
| NSOC          | NSCLP                | 0.15     | 0.082     | 1.82    | 0.068   |
| NSOC          | NSCLO                | 0.18     | 0.098     | 1.81    | 0.07    |
| NSCL/P        | NSOC                 | 0.2      | 0.072     | 2.8     | 0.0051  |
| NSCL/P        | NSCL/P               | 0.2      | 0.072     | 2.8     | 0.0051  |
| NSCL/P        | NSCLP                | 0.16     | 0.081     | 1.95    | 0.051   |
| NSCL/P        | NSCLO                | 0.22     | 0.1       | 2.25    | 0.025   |
| NSCLP         | NSOC                 | 0.16     | 0.072     | 2.29    | 0.022   |
| NSCLP         | NSCL/P               | 0.16     | 0.072     | 2.24    | 0.025   |
| NSCLP         | NSCLP                | 0.12     | 0.082     | 1.45    | 0.15    |
| NSCLP         | NSCLO                | 0.2      | 0.1       | 2.02    | 0.044   |
| NSCLO         | NSOC                 | 0.09     | 0.076     | 1.18    | 0.24    |
| NSCLO         | NSCL/P               | 0.1      | 0.076     | 1.3     | 0.19    |
| NSCLO         | NSCLP                | 0.08     | 0.086     | 0.89    | 0.37    |
| NSCLO         | NSCLO                | 0.11     | 0.11      | 0.97    | 0.33    |

Note: NSOC, non-syndromic orofacial cleft cases by combining NSCLP, NSCLO and NSCPO together; NSCL/P, non-syndromic cleft lip with or without palate (NSCLP&NSCLO); NSCLP, non-syndromic cleft lip and palate; NSCLO, non-syndromic cleft lip only; CHW, Western Chinese.

Supplementary Table 13. Association of PGS and Non-syndromic orofacial clefts by phenotypic group

| Dataset       | Phenotype | Case/Control | Estimate | Std.Error | z value | p-value         | OR(95%CI)       | R2 w PGS | R2 wo PGS | AUC(95%CI) PGS  | AUC(95%CI) PGS&Sex |
|---------------|-----------|--------------|----------|-----------|---------|-----------------|-----------------|----------|-----------|-----------------|--------------------|
| CHW_ZH        | NSOC      | 1620/947     | 0.085    | 0.043     | 1.98    | <b>0.047</b>    | 1.09(1.00-1.19) | 0.12     | 0.12      | 0.52(0.5-0.55)  | 0.57(0.54-0.59)    |
|               | NSCL/P    | 762/947      | 0.016    | 0.052     | 0.31    | 0.76            | 1.02(0.92-1.13) | 0.16     | 0.16      | 0.51(0.48-0.54) | 0.60(0.57-0.63)    |
|               | NSCLO     | 749/947      | 0.019    | 0.053     | 0.36    | 0.72            | 1.02(0.92-1.13) | 0.16     | 0.16      | 0.51(0.48-0.54) | 0.60(0.57-0.63)    |
|               | NSCPO     | 858/947      | 0.13     | 0.049     | 2.73    | <b>0.0064</b>   | 1.14(1.04-1.26) | 0.11     | 0.1       | 0.54(0.51-0.56) | 0.54(0.51-0.57)    |
| CHE_Axiom&HSA | NSCL/P    | 322/722      | 0.35     | 0.11      | 3.22    | <b>0.0013</b>   | 1.43(1.15-1.77) | 0.66     | 0.65      | 0.61(0.58-0.65) | 0.87(0.85-0.90)    |
|               | NSCLP     | 215/722      | 0.35     | 0.13      | 2.66    | <b>0.0078</b>   | 1.41(1.10-1.82) | 0.65     | 0.65      | 0.61(0.56-0.65) | 0.87(0.84-0.91)    |
|               | NSCLO     | 107/722      | 0.36     | 0.17      | 2.09    | <b>0.036</b>    | 1.43(1.02-1.99) | 0.62     | 0.61      | 0.63(0.57-0.68) | 0.87(0.83-0.92)    |
| CHS_ZH        | NSOC*     | 3000/11179   | 0.23     | 0.022     | 10.28   | <b>8.64E-25</b> | 1.26(1.20-1.31) | 0.021    | 0.009     | 0.57(0.56-0.58) | 0.60(0.59-0.62)    |
|               | NSCLP*    | 2020/11179   | 0.33     | 0.026     | 12.63   | <b>1.46E-36</b> | 1.39(1.32-1.47) | 0.039    | 0.018     | 0.61(0.59-0.62) | 0.66(0.65-0.68)    |
|               | NSCPO*    | 980/11179    | 0.017    | 0.036     | 0.47    | 0.64            | 1.02(0.95-1.09) | 0.004    | 0.004     | 0.50(0.49-0.52) | 0.58(0.56-0.60)    |

Note: NSOC, non-syndromic orofacial cleft cases by combining NSCLP, NSCLO and NSCPO together; NSCL/P, non-syndromic cleft lip with or without palate (NSCLP&NSCLO); NSCLP, non-syndromic cleft lip and palate; NSCLO, non-syndromic cleft lip only; CHW, Western Chinese; CHE, Eastern Chinese; CHS, Southern Chinese; \* indicate without Sex in the model; OR, Odds ratio; 95%CI, 95% confidence interval; R2, the proportion of variance explained by the fixed predictors; w, with; wo, without; AUC, Area under curve; PGS, polygenic genetic score.
