# Supplementary material for: Multi-ancestry Genome Wide Association Study Meta-analysis of Non-syndromic Orofacial Clefts
Source: bioRxiv or medRxiv preprint supplement (doi:10.1101/2024.12.06.24318522), 2024-12-13
Supplement: Supplementary file [file media-2.pdf]

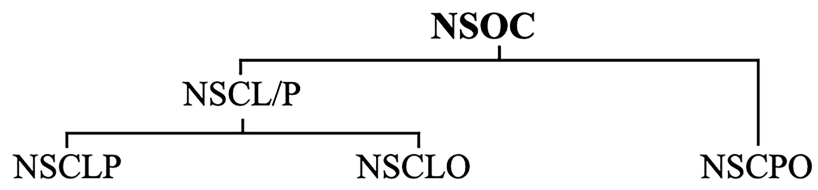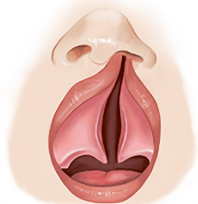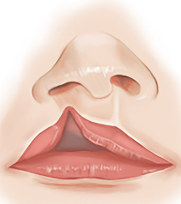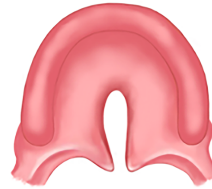

**Supplementary Fig.1** NSOC and its sub-phenotypes

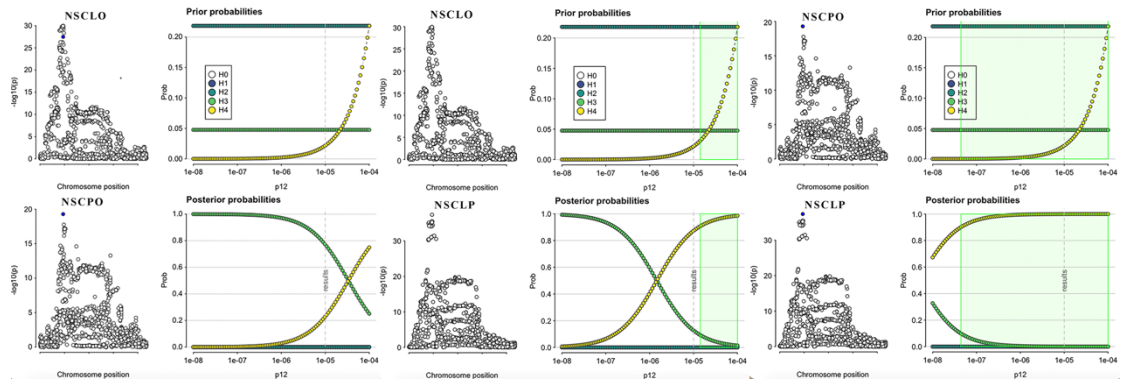

**Supplementary Fig. 2** Colocalization Analysis on IRF6 locus (Chr1: 209800000-210670000) in Chinese population

p12, Prior probability a random SNP in the region is jointly causal for both traits; The green region shows the region -the set of values of p12 for which  $H_4 > 0.9$  the rule that was specified. blue point on the left input data indicate the posterior probabilities that a SNP is causal if H4 were true.

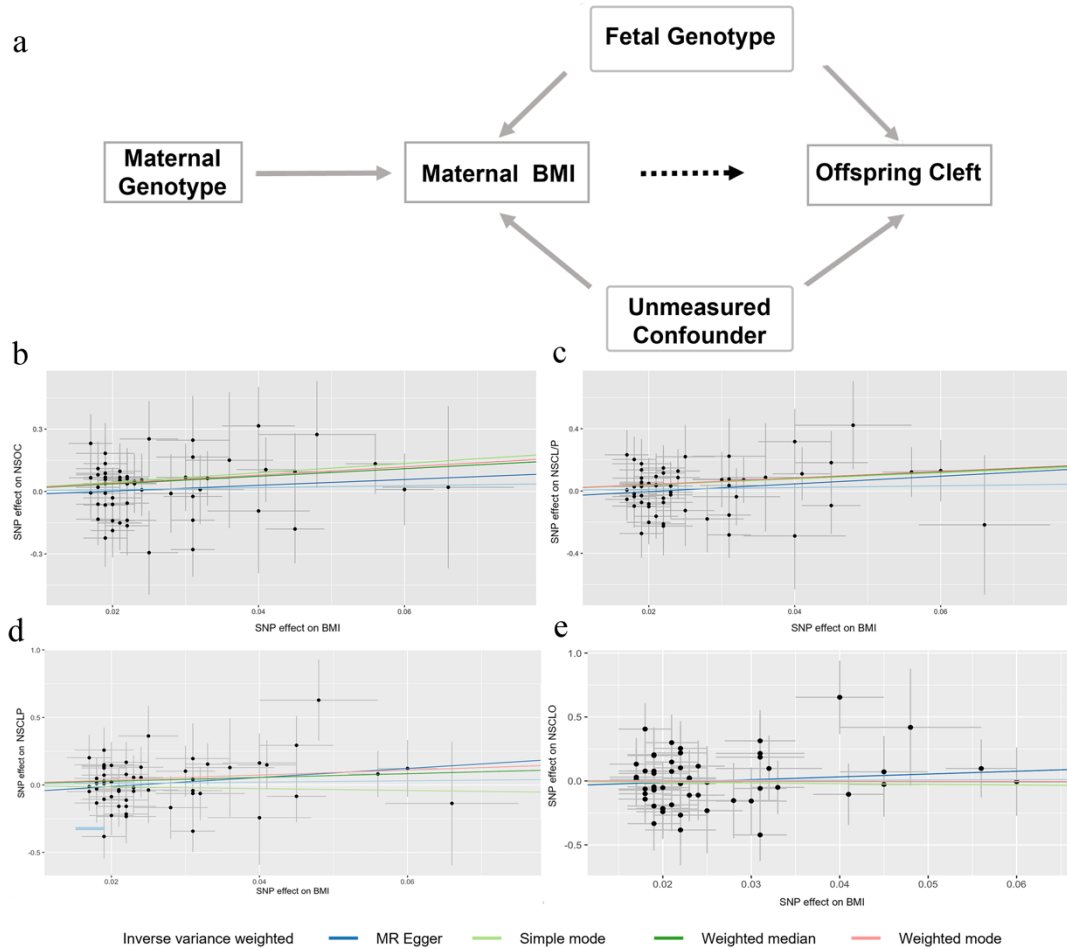

### Supplementary Fig.3 Mendelian randomization analyses

a, Diagram illustrating the Mendelian randomization analyses used to test for a causal; b–e, Results of two-sample Mendelian randomization analyses testing the effect of maternal BMI on fetal orofacial clefts. Points represent SNP effect estimates, and error bars show 95% confidence intervals.

NSOC, non-syndromic orofacial cleft cases by combining NSCLP, NSCLO and NSCPO together; NSCL/P, non-syndromic cleft lip with or without palate (NSCLP&NSCLO); NSCLP, non-syndromic cleft lip and palate; NSCLO, non-syndromic cleft lip only; NSCPO, non-syndromic cleft palate only.
